## **Cellular profiling of a recently-evolved social behavior**

Zachary V. Johnson\*, Brianna E. Hegarty\*, George W. Gruenhagen\*, Tucker J. Lancaster, Patrick T. McGrath<sup>†</sup>, Jeffrey T. Strelman<sup>†</sup>

\* these authors contributed equally to this work

<sup>†</sup> corresponding authors

### **ABSTRACT**

Social behaviors are essential for survival and reproduction and vary strongly among individuals, species, and heritable brain diseases. The molecular and cellular bases of this variation are poorly resolved, and discovering them is necessary to understand how neural circuit and behavioral functions—and dysfunctions—vary in social contexts. Here we integrate single nucleus RNA-sequencing (snRNA-seq) with comparative genomics and automated behavior analysis to investigate the neurobiology of castle-building, a recently-evolved social, spatial, goal-directed, and repetitive construction behavior in Lake Malawi cichlid fishes. We simultaneously control for and analyze two biological variables correlated with castle-building behavior: quivering, a courtship “dance” behavior, and relative gonadal mass. We find signatures of building-, quivering-, and gonadal-associated neuronal excitation, gene expression, and neurogenesis in distinct cell populations. Converging lines of evidence support the involvement of estrogen, TrkB, and CCK signaling systems, and specific pallial excitatory neuronal subpopulations, in castle-building behavior. We show additional evidence that castle-building has evolved in part through genomic divergence in a gene module that is selectively expressed in stem-like quiescent radial glial cells (RGCs) lining the ventricular zone of the pallium. This RGC subpopulation exhibits signatures of a building-associated departure from quiescence, which in turn is associated with neuronal rebalancing in the putative fish homologue of the hippocampus. Our work supports an unexpected role for glia and neurogenesis in the evolution of social behavior, and more broadly shows how snRNA-seq can be used to systematically profile the cellular bases of previously unstudied social behaviors in new species systems.

## 29 **INTRODUCTION**

30 Social behaviors evolve rapidly and vary among individuals, species, and human brain disease states  
31 (Johnson and Young 2017). Different experimental traditions spanning genomics (C. R. Smith et al. 2008;  
32 Küpper et al. 2016; Lamichhane et al. 2016; Bendesky et al. 2017; York et al. 2018; Pfenning et al. 2014;  
33 Dias and Walsh 2020; Stein et al. 2017), endocrinology (S. A. Juntti et al. 2016; Boender and Young 2020;  
34 Adkins-Regan 2013; O’Connell, Matthews, and Hofmann 2012; S. Ogawa et al. 2000; Heinrichs and Gaab  
35 2007; Schiller, Meltzer-Brody, and Rubinow 2015), and circuit neuroscience (Gutzeit et al. 2020; Hung et al.  
36 2017; Amadei et al. 2017; Anderson 2016; Gangopadhyay et al. 2021; Kohl et al. 2018; S. B. Nelson and  
37 Valakh 2015; Bachevalier and Loveland 2006) have advanced our understanding of the biological  
38 underpinnings of social behavior. Bridging these levels is challenging, and most efforts have focused on a  
39 relatively small number of model species—typically genetically inbred strains (S. Juntti 2019; Gallant and  
40 O’Connell 2020; Laurent 2020; Keifer and Summers 2016; Brenowitz and Zakon 2015; Jourjine and Hoekstra  
41 2021; Johnson and Young 2018). Two drawbacks to this strategy are a lack of access to many social  
42 behaviors that are not expressed in traditional models, and a limited ability to understand how natural genetic  
43 variation generates variation in circuit and behavioral functions—and dysfunctions—in social contexts. The  
44 ability to profile many cell populations simultaneously in any species with a suitable reference genome erodes  
45 historical constraints that have faced investigations of non-traditional social behaviors and species systems.  
46 Here we integrate single nucleus RNA-sequencing (snRNA-seq) with automated behavior analysis and  
47 comparative genomics to investigate the molecular, genetic, and cellular substrates of castle-building, a  
48 recently-evolved (<1 Mya) social, goal-directed, repetitive and reproductive behavior in Lake Malawi cichlid  
49 (Cichlidae) fishes.

50 Cichlids are teleost (*Teleostei*) fishes, a group representing 40-50% of all living vertebrate species  
51 (Salzburger 2018). At teleosts, cichlids possess predicted homologues for ~80% of human disease-  
52 associated genes (Howe et al. 2013), and their brains are composed of conserved cell populations with  
53 conserved molecular, electrophysiological, morphological, transcriptional, and behavioral properties  
54 (O’Connell and Hofmann 2011; Xie and Dorsky 2017; Elliott et al. 2017; Jurisch-Yaksi, Yaksi, and Kizil 2020).  
55 For example, the teleost telencephalon contains conserved cell populations that regulate social behaviors  
56 across vertebrate lineages (O’Connell and Hofmann 2011). In Lake Malawi, ~800 cichlid species are  
57 behaviorally diverse but genetically similar, representing a powerful system for investigating the neurogenetic  
58 basis of behavioral variation (York et al. 2015; Baran and Streelman 2020; Johnson and Young 2018;  
59 Johnson, Arrojwala, et al. 2020; York et al. 2018; Ribbink et al. 1983; Johnson, Moore, et al. 2020).  
60 Approximately 200 species express bower construction behaviors during the breeding season, whereby  
61 males manipulate sand into species-specific structures for courtship (York et al. 2015; Johnson, Arrojwala, et  
62 al. 2020; Long et al. 2020). Many species dig crater-like “pits” while others build volcano-like “castles,” and  
63 these behavioral differences are associated with genomic divergence in a ~19 Mbp chromosomal region  
64 enriched for genes that exhibit *cis*-regulated behavior-associated expression (York et al. 2018).

65 In this paper we investigate castle-building behavior in *Mchenga conophoros*, a Lake Malawi cichlid and an  
66 uncharted species in behavioral neuroscience. We map the cellular diversity of the telencephalon, identify cell  
67 type-specific signatures of active castle-building behavior, and link genomic divergence associated with  
68 castle-building evolution to specific cell populations. Our work shows how snRNA-seq profiling can be used to  
69 systematically identify converging lines of evidence for candidate genes, molecular systems, cell populations,  
70 and brain regions underlying new behaviors in new species systems.

## 71 **RESULTS**

### 72 **Castle-building is associated with increased quivering behavior and gonadal physiology**

73 We used an automated behavior analysis system (Johnson, Arrojwala, et al. 2020; Long et al. 2020) to  
74 monitor reproductive adult *Mchenga conophoros* males as they freely interacted with four reproductive adult  
75 females and sand over multiple days (Fig. 1A). Briefly, this system uses depth sensing to measure structural  
76 changes across the sand surface and action recognition to predict building and quivering behaviors from  
77 video data. We sampled pairs of males at the same time in which one male was actively castle-building  
78 (n=19) and the other was not (“control”, n=19; pairs correspond to rows in Fig. 1B). For each subject, we also  
79 recorded the gonadal somatic index (GSI), a measure of relative gonadal mass that is correlated with

80 gonadal steroid hormone levels and social behaviors in cichlids (Maruska and Fernald 2010; Ramallo et al.  
81 2015; Alward et al. 2019) (Table S1). The volume of sand displaced by males was strongly and positively  
82 correlated with the total number of building events predicted from video data by action recognition  
83 ( $p=8.15 \times 10^{-13}$ , t-test). For simplicity, we used both depth and action recognition data to generate a single  
84 “Bower Activity Index” (BAI), which also differed strongly between building and control males (Fig. 1G;  
85  $p=4.24 \times 10^{-8}$ , paired t-test). Building males quivered more (a stereotyped courtship “dance” behavior; Fig. 1H;  
86  $p=9.18 \times 10^{-6}$ , paired t-test), and had greater GSIs (Fig. 1I;  $p=0.0142$ , paired t-test) than controls. Taken  
87 together, these results are consistent with castle-building, like many social behaviors in nature, being  
88 embedded within a suite of behavioral and physiological changes tied to reproduction.

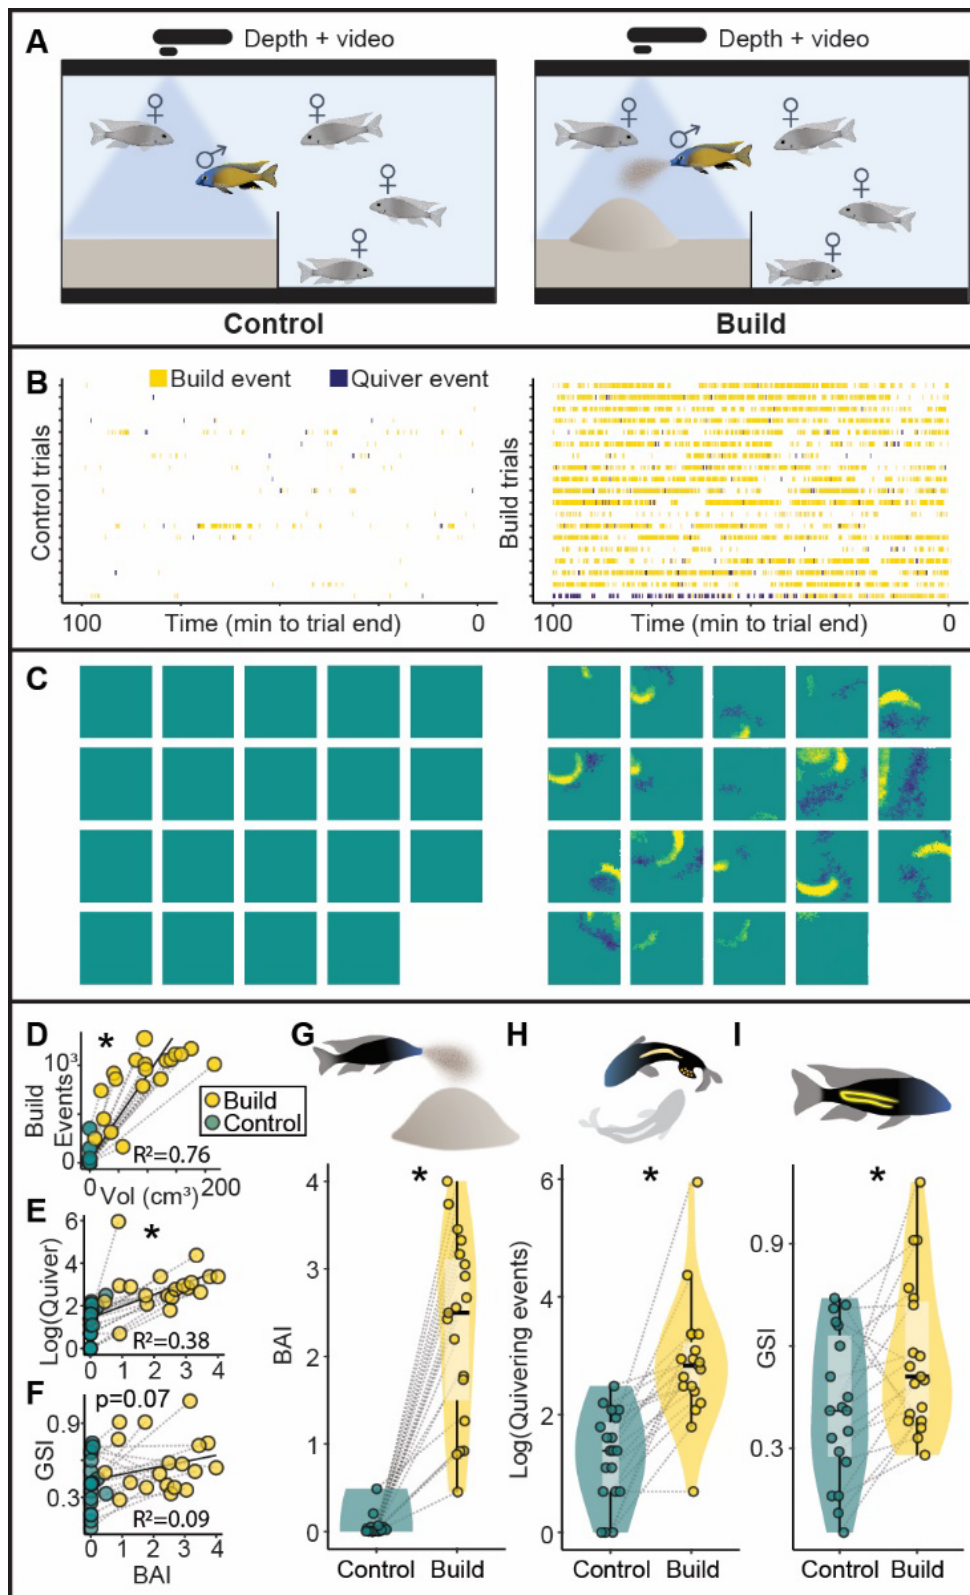

89

90 **Figure 1. Castle-building is associated with increased quivering and relative gonadal mass.** (A) 19  
 91 pairs of building (right) and control (left) males were sampled. Action recognition (B, yellow=building,  
 92 blue=quivering, each trial is represented by a row, with pairs matched by row between left and right panels)  
 93 and depth sensing (C, yellow=elevations, blue=depressions, each square represents total depth change for  
 94 one trial, with pairs matched by row and column between left and right panels) revealed behavioral  
 95 differences between building and control males. (D) Structural change measured through depth sensing  
 96 (adjusted for body size) was strongly and positively correlated with building behaviors predicted through  
 97 action recognition, and these measures were combined into a single Bower Activity Index (BAI, x-axis in E

98 and F). (E) BAI was positively correlated with quivering behaviors across trials, and (F) trended toward a  
99 positive correlation with GSI across trials. Building was associated with significantly greater BAI (G), quivering  
100 (H, log-normalized), and GSI (I). Gray lines in panels D-I show pairs of control and building males.

## 101 **Telencephalic nuclei reflect major neuronal and non-neuronal cell classes**

102 Telencephala (n=38) were combined into ten pools (n=5 behave, n=5 control, 3-4 telencephala/pool) for  
103 snRNA-seq (Fig. 2A). In total, >3 billion RNA reads were sequenced and mapped to the Lake Malawi cichlid  
104 *Maylandia zebra* reference genome (Conte et al. 2019). 33,674 nuclei (~900 nuclei/subject) passed quality  
105 control filters and were linked back to test subjects using genomic DNA. Coarse-grained clustering grouped  
106 nuclei into 15 “primary” (1°) clusters and finer-grained clustering grouped nuclei into 53 “secondary” (2°)  
107 clusters (ranging from 57-1,905 nuclei, Fig. 2B). Established marker genes revealed known neuronal and  
108 non-neuronal cell types (Fig. 2C), including excitatory (*slc17a6+*) and inhibitory (*gad2+*) neurons,  
109 oligodendrocytes and oligodendrocyte precursor cells (OPCs, *olig2+*), radial glial cells (RGCs, *fabp7+*),  
110 microglia, pericytes, and hematopoietic stem cells (Table S2). Additional analyses revealed nearly cluster-  
111 exclusive expression of many genes (Fig. 2D), and cluster-specific expression of genes encoding  
112 transcription factors (TFs; Fig. 2E-F) and neuromodulatory signaling molecules (Fig. 2G-H) that exhibit  
113 conserved neuroanatomical expression patterns in teleosts (Table S2). The relative proportions of clusters  
114 were consistent across individuals (Fig. 2I, see Table S3 for detailed 1° and 2° cluster information). For  
115 clarity, we assigned each 1° cluster a numeric identifier (1-15) followed by a label indicating one or more of  
116 these cell classes (e.g. for RGCs, “\_RGC”). 2° cluster labels were rooted in these 1° labels, but with a second  
117 numeric identifier indicating the relative size within the corresponding “parent” 1° cluster (e.g. “4\_GABA” is a  
118 1° cluster expressing inhibitory neuronal markers, and “4.3\_GABA” is the third largest 2° cluster within  
119 4\_GABA). Marker genes for every individual primary and secondary cluster were independently enriched  
120 ( $q < 0.05$ ) for eight GO categories related to cell morphology, connectivity, conductance, and signal  
121 transduction (Table S4), suggesting these were major axes distinguishing clusters in this study.

## 122 **Clusters are more strongly distinguished by transcription factors and ligands than receptors**

123 Previous work suggests that different categories of genes (e.g. TFs, ligands, receptors) may differ in  
124 transcriptional plasticity across cell populations (Moffitt et al. 2018; O’Connell and Hofmann 2012). We  
125 curated lists of genes encoding either 1) neurodevelopment/neuroanatomy-associated TFs (nTFs, n=43;  
126 Table S5) with conserved brain region-specific expression patterns in multiple teleost lineages (Table S2), 2)  
127 neuromodulatory ligands or related transporter proteins (“ligands”, n=35), or 3) neuromodulatory receptors  
128 (“receptors”, n=108), and investigated their expression patterns across clusters. 1° and 2° marker genes  
129 were more strongly enriched for nTFs and ligands compared to receptors (receptors versus nTFs,  $p \leq 8.33 \times 10^{-4}$   
130 for both 1° and 2° clusters, FET; ligands,  $p \leq 0.0068$  for both; versus receptors,  $p \geq 0.75$  for both, Fig. 2J),  
131 consistent with recent scRNA-seq analyses of the mouse hypothalamus (Moffitt et al. 2018). Notably, several  
132 nTFs involved in dorsal-ventral (DV) patterning in early neural development exhibited striking polarity in  
133 expression across clusters (Fig. 2F). For example, *dlx* genes and *is11* mark the ventral telencephalon while  
134 *emx* genes mark the dorsal telencephalon during the neurula stage (Sylvester et al. 2013), suggesting that  
135 neuronal populations in adulthood may retain transcriptional signatures of their developmental origins.  
136 Together these data may reflect organizing principles whereby cell populations are more strongly aligned with  
137 transcriptional programs underlying neurodevelopment and ligand synthesis, and neuromodulatory receptors  
138 are expressed more promiscuously across cell populations.



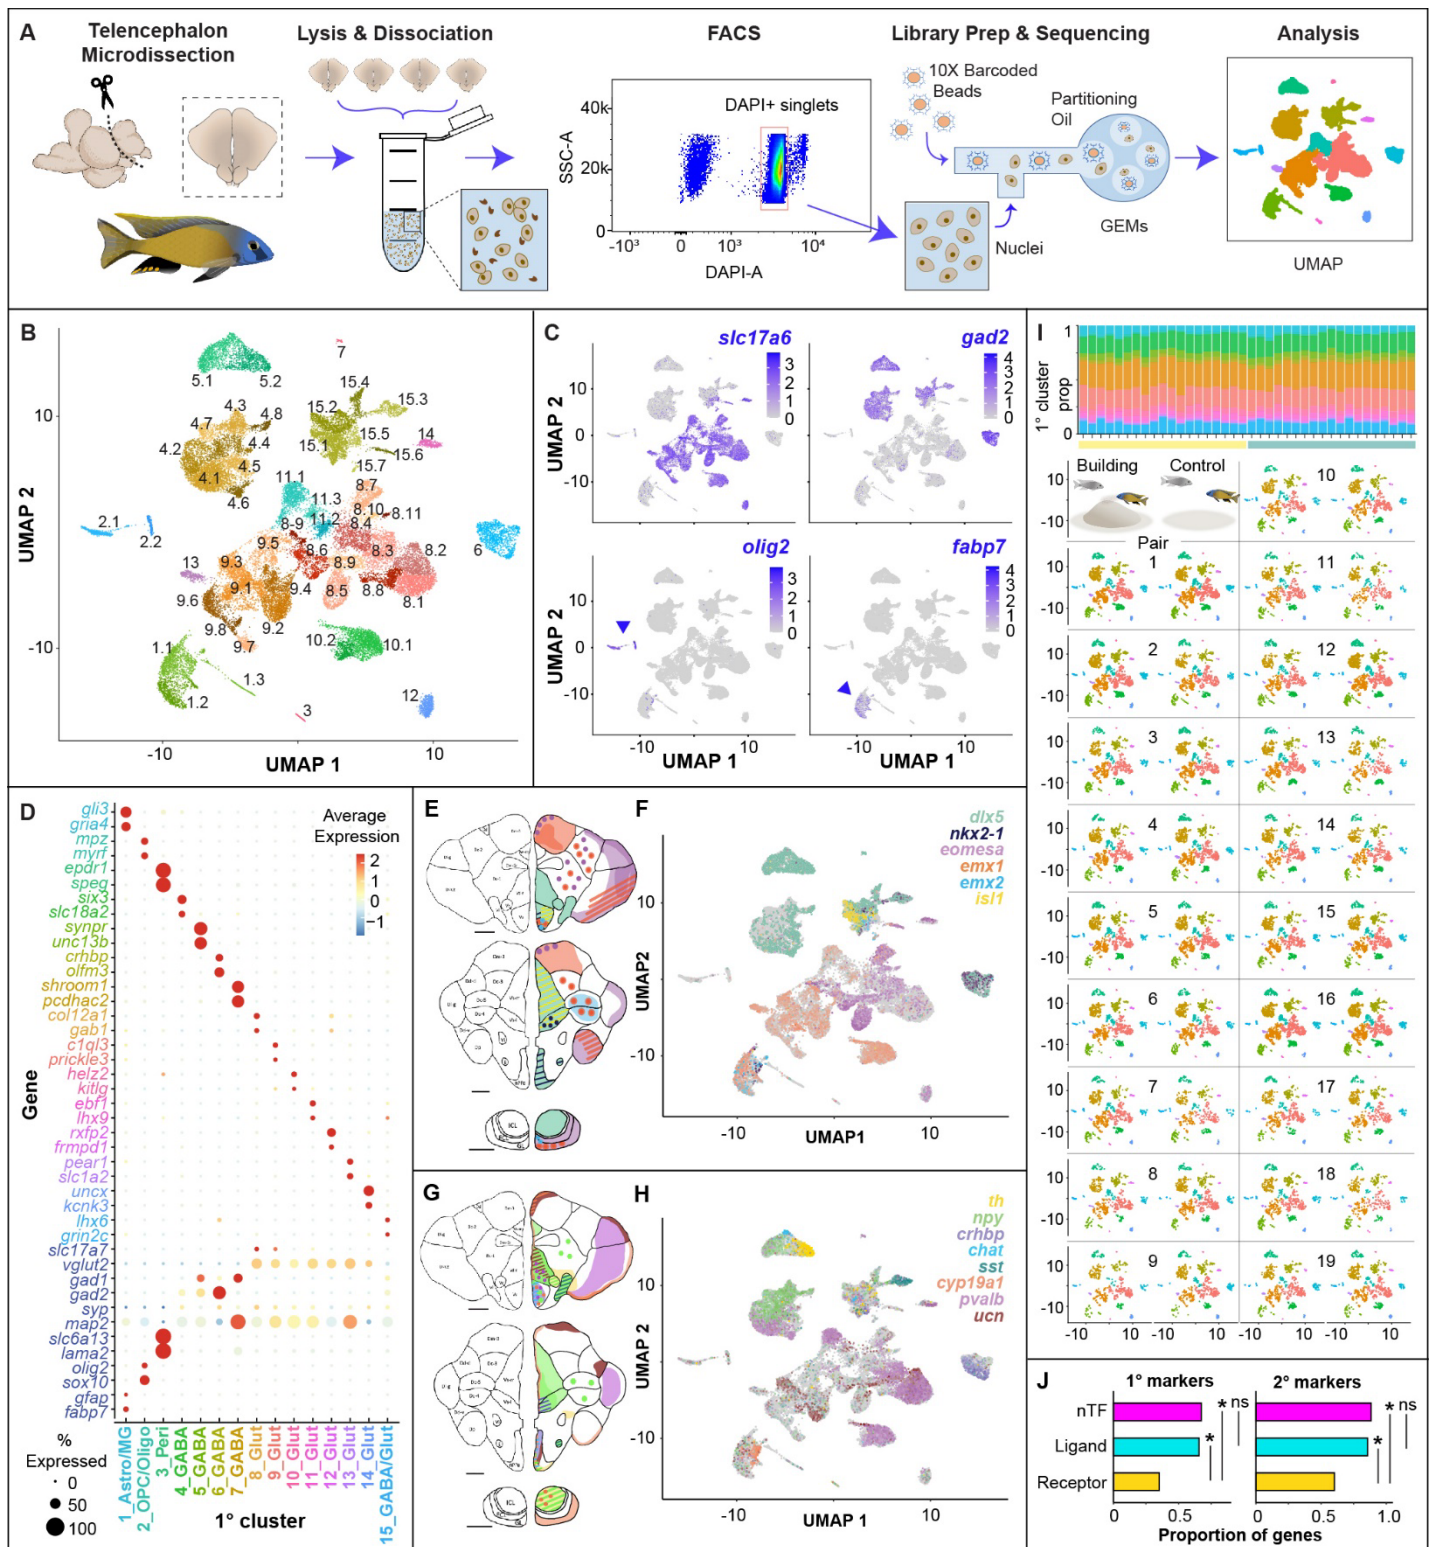

139

140  
141  
142  
143  
144  
145  
146  
147  
148  
149

**Figure 2. Molecular and cellular diversity of the cichlid telencephalon.** (A) Schematic of experimental pipeline for snRNA-seq. (B) Nuclei cluster into 1° (n=15) and 2° (n=53) clusters. (C) Known marker genes reveal distinct clusters of excitatory neurons (*slc17a6*+), inhibitory neurons (*gad2*+), oligodendrocytes and oligodendrocyte precursor cells (*olig2*+), radial glial cells (*fabp7*+), as well as other less abundant cell types (not shown, see Table S2). (D) Cluster proportions are consistent across 38 males. (E) Clusters are distinguished by expression of cluster-exclusive and known cell type marker genes. Conserved nTFs (F, G) and ligands (and related genes; H, I) exhibit conserved neuroanatomical expression profiles in the teleost telencephalon and are distinctly expressed in specific clusters. (J) Genes encoding neuromodulatory receptors are more promiscuously expressed across 1° and 2° clusters than genes encoding neuromodulatory ligands or nTFs.

## **Building, quivering, and gonadal physiology are associated with transcriptional signatures of neuronal excitation in distinct cell populations**

To identify candidate cell populations that may regulate castle-building behavior, we first investigated transcriptional signatures of neuronal excitation. Neuronal excitation triggers intracellular molecular cascades that induce transcription of conserved immediate early genes (IEGs) (Lyons and West 2011), and mapping IEG expression is a strategy for identifying neuronal populations that are excited by specific stimuli or behavioral contexts (Guzowski et al. 2005). However, IEG transcripts tend to be recovered at lower levels compared to other genes in sc/snRNA-seq data (Y. E. Wu et al. 2017; Lacar et al. 2016; Moffitt et al. 2018). To better track IEG responses, we identified genes that were selectively co-transcribed with three established IEGs (*c-fos*, *egr1*, *npas4*) independently across 2° clusters. In total, we identified 25 “IEG-like” genes (Table S6), most (17/25, 68%) of which had previously been identified as IEGs, but eight of which have not (to our knowledge, predicted homologues of human *DNAJB5*, *ADGRB1*, *GPR12*, *ITM2C*, *IRS2*, *RTN4RL2*, *RRAD*; Fig. 3A). These genes may include new conserved markers of neuronal excitation.

We assigned each nucleus an “IEG score,” equal to the number of unique IEG-like genes expressed. To disentangle building-, quivering-, and GSI-associated signals, we tested a sequence of models in which these variables competed in different combinations to explain variance in IEG score. Effects were considered significant if the raw p-value was significant ( $p < 0.05$ ) in every model and if the FDR-adjusted harmonic mean p-value ( $\text{hmp}_{\text{adj}}$ ) was significant across models ( $\text{hmp}_{\text{adj}} < 0.05$ ) (Wilson 2019). Building was associated with increased IEG expression in 9\_Glut ( $\text{hmp}_{\text{adj}} = 0.0016$ ; Fig. 3B), a cluster distinguished by markers of the dorsal pallium (Martinelli et al. 2016). We expected that some behaviorally-relevant populations may not align with clusters. For example, neuropeptides can diffuse to modulate distributed cell populations expressing their target receptors (Johnson and Young 2017), and other behaviorally-relevant populations may represent a small proportion of one cluster. We therefore analyzed populations defined by nTF, ligand, and receptor genes, both within clusters and regardless of cluster. IEG score was associated with building, quivering, and GSI in distinct cell populations (Fig. 3B). Notably, building was associated with IEG score in 9\_Glut, a cluster distinguished by markers of the dorsal and lateral pallium, in three populations defined regardless of cluster (*elavl4+*, *cckbr+*, *ntrk2+*), and in 4\_GABA *htr1d+*, 4\_GABA *vipr2+*, 15\_GABA/Glut *tacr2+*, 11\_Glut *cckbr+*, and 11.1\_Glut *npr2+* nuclei (Fig. 3C), consistent with a role for these molecular systems in the neural coordination of building. Quivering was associated with IEG score in 5.2\_GABA *elav4+* nuclei, a subpopulation strongly and/or selectively expressing a suite of genes expressed in the olfactory bulb granule cell layer and in newborn dopaminergic neurons in teleosts (e.g. *tac1*, *pax6*, *trh*, *th*, *dat*, *vmat*). These data are consistent with previous work showing activation of olfactory and dopaminergic circuitry during courtship in diverse systems (Keleman et al. 2012; van Furth, Wolterink, and van Ree 1995; Ishii and Touhara 2019; Louilot et al. 1991; Johnson and Young 2015). Behavior-associated IEG expression was most strongly associated with behavior expressed approximately 60 minutes prior to sample collection, consistent with previously reported nuclear IEG RNA time courses (Fig. 3D) (Lacar et al. 2016). Previous work has demonstrated behavior-associated shifts in correlated IEG expression across brain regions in diverse species, such that social context is associated with a shift in how strongly IEG expression in one region predicts IEG expression in another region across individuals (Johnson and Young 2017; Johnson et al. 2016, 2017; Hoke, Ryan, and Wilczynski 2005; Yang and Wilczynski 2007; Almeida et al. 2019). We found that populations exhibiting building-associated IEG expression also differed in correlated IEG expression across building versus control males (Fig. 3E), consistent with shifts in correlated excitation across cell populations during building. Because 1) the excitatory and inhibitory phenotypes and 2) the directionality of changes in correlated IEG expression were both known, simplified but testable circuit hypotheses about synaptic connectivity among populations can be generated. For example, because building is associated with a more negatively correlated Fos expression between 4\_GABA *vipr2+* nuclei (inhibitory) and other populations. A simple and testable model is that 4\_GABA *vipr2+* directly synapses onto these populations. More broadly, these results identify specific cell populations (e.g. 9\_Glut) and molecular systems (e.g. TrkB, CCK) as candidate regulators of castle-building.



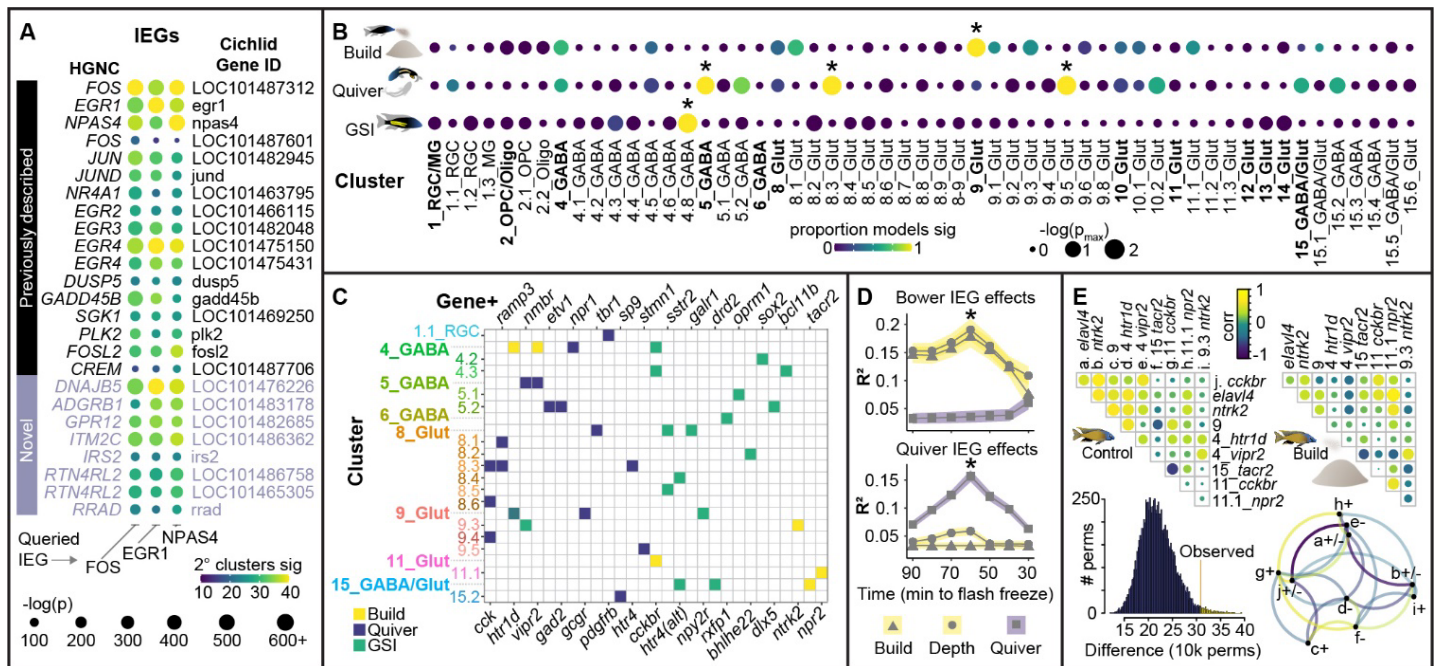

**Figure 3. Distinct cell populations exhibit building-, quivering-, and gonadal-associated IEG expression.** (A) 25 genes were selectively co-expressed with *c-fos*, *egr1*, and *npas4* across cell populations. Building-, quivering-, and gonadal-associated IEG expression was observed in distinct clusters (B) and gene-defined populations (C, filled squares indicate significant effects,  $q < 0.05$ ). (D) IEG expression was most strongly associated with the amount of building (top) and quivering (bottom) behavior performed approximately 60 minutes prior to tissue freezing. (E) Among populations exhibiting building-associated IEG expression, correlated IEG expression across individuals differed between control (left) and building (right) males (permuted null distribution shown in the bottom left; schematic indicating the directionality of the strongest changes, with excitatory and inhibitory phenotypes indicated by “+” and “-”, respectively, shown in bottom right; letter codes for cell populations match letter codes above heatmaps).

### **A minority of neuronal populations account for the majority of building-associated gene expression**

Changes in social behavior are associated with changes in brain gene expression in diverse lineages (Robinson, Fernald, and Clayton 2008; Baran and Strelman 2020; Patil et al. 2021; York et al. 2018), but the underlying cell populations driving these effects are usually not determined. We performed an unsupervised analysis to identify differentially expressed genes (DEGs) in specific clusters. A relatively small subset of neuronal clusters accounted for a disproportionate number of building-associated DEGs (bDEGs), a pattern that was also true of quivering-associated DEGs (qDEGs) and gonadal-associated DEGs (gDEGs; Fig. 4A, dot color and size reflect number and proportion of DEGs across clusters, respectively). bDEGs were overrepresented in three excitatory neuronal clusters (8\_Glut, 9\_Glut, 10\_Glut;  $q \leq 1.83 \times 10^{-4}$  for all), qDEGs were overrepresented in two neuronal clusters (15\_GABA/Glut, 11\_Glut,  $q \leq 0.036$  for both), and gDEGs were overrepresented in one inhibitory neuronal cluster (5\_GABA,  $q = 1.30 \times 10^{-5}$ ). bDEGs were overrepresented in a suite of aligned 2° clusters ( $q \leq 6.69 \times 10^{-4}$  for all), qDEGs were overrepresented in 15.2\_GABA, 8.1\_Glut, and 8.6\_Glut ( $q \leq 0.0074$  for all), and gDEGs were overrepresented in 8.3\_Glut and 8.4\_Glut ( $q \leq 0.039$  for both). Thus, distinct clusters were overrepresented for bDEGs, qDEGs, and gDEGs. Interestingly, a common set of bDEGs, gDEGs, and qDEGs were the same individual genes ( $n = 81$ ), consistent with behavior and gonadal hormones recruiting similar transcriptional programs in distinct populations (Fig. 4B). These results highlight the potential involvement of a small set of 2° neuronal clusters (8.3\_Glut, 8.9\_Glut, 9.7\_Glut, 10.1\_Glut) in castle-building behavior.

Behavior-associated DEGs exhibited a strong direction bias, and were predominantly upregulated in both 1° and 2° clusters ( $p \leq 1.39 \times 10^{-12}$  for all, Fig. 4C). In contrast, gDEGs tended more modestly toward upregulation in 1° clusters (1° gDEG effects,  $p = 2.09 \times 10^{-5}$ ) and were not directionally biased in 2° clusters (2° gDEG effects,  $p = 0.92$ ). Upregulated bDEGs, qDEGs, and gDEGs were each independently enriched for a large number of the same GO terms ( $q < 0.05$  for 499 GO Biological Processes, 147 GO Cellular Components, and



233 111 GO Molecular Functions), the strongest of which were related to synaptic transmission and plasticity (e.g.  
 234 “synaptic signaling,”  $q \leq 3.54 \times 10^{-50}$  for all; “regulation of synaptic plasticity,”  $q \leq 1.83 \times 10^{-18}$  for all) or cell  
 235 differentiation and neurogenesis (e.g. “nervous system development,”  $q \leq 6.93 \times 10^{-47}$  for all; “neurogenesis,”  
 236  $q \leq 4.49 \times 10^{-35}$  for all; “cell morphogenesis involved in neuron differentiation,”  $q < 6.96 \times 10^{-29}$  for all; Fig. 4D),  
 237 consistent with behavior- and gonadal-associated regulation of synaptic function and cell morphogenesis.

238 Estrogen has been linked to both neuronal excitability and neurogenesis and regulates social behavior in  
 239 diverse species (Diotel et al. 2013; Duarte-Guterman et al. 2015; Kelly and Rønnekleiv 2009; Sarkar et al.  
 240 2008). Estrogen can impact gene expression by binding to estrogen receptors (ERs), forming a complex that  
 241 is translocated into the nucleus and acts as a TF by binding to Estrogen Response Elements (EREs) in DNA  
 242 (Klinge 2001; Amenyogbe et al. 2020). bDEGs, qDEGs, and gDEGs were independently enriched for EREs,  
 243 consistent with a role for estrogen in modulating behavior- and gonadal-associated gene expression  
 244 ( $p \leq 2.92 \times 10^{-4}$  for all; Fig. 4E; ERE-containing gene list in Table S7). ERE-containing bDEGs (n=22 unique  
 245 genes) were most strongly enriched for GO terms including “modulation of chemical synaptic transmission”  
 246 (top GO Biological Process,  $q = 2.30 \times 10^{-4}$ ) and “Schaffer collateral - CA1 synapse” (top Cellular Component,  
 247  $q = 2.22 \times 10^{-5}$ ), highlighting building-associated estrogenic modulation of synaptic function as a potential player  
 248 in castle-building.

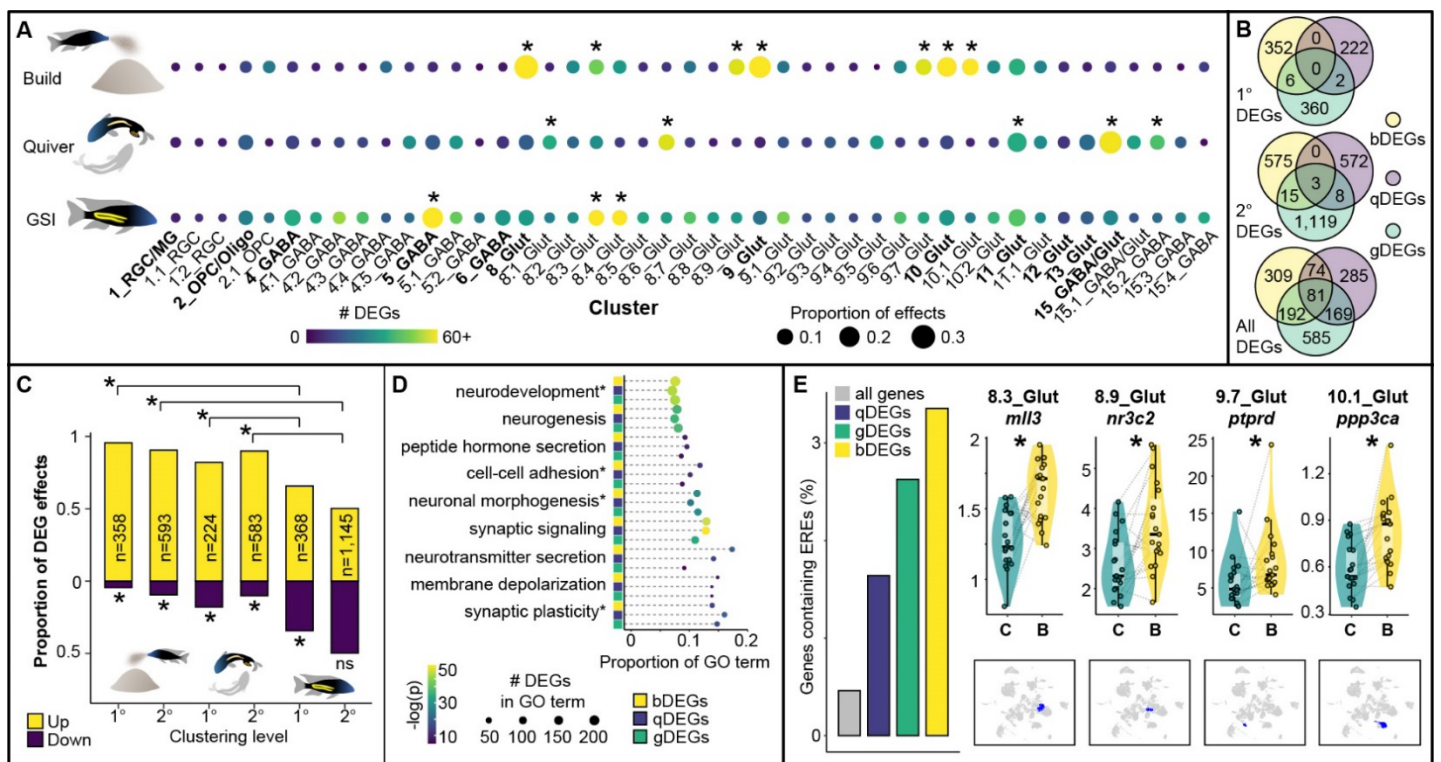

249

250 **Figure 4. Building, quivering, and GSI are associated with distinct patterns of cell type-specific gene**  
 251 **expression.** (A) Distinct 1° and 2° clusters show a disproportionate number of bDEGs, qDEGs, and gDEGs.  
 252 (B) A set of 81 genes exhibits building-, quivering, and gonadal-associated expression in largely non-  
 253 overlapping clusters. (C) Behavior-associated gene expression is driven by upregulation, whereas gonadal-  
 254 associated gene expression is driven by a balance of up- and downregulation. (D) bDEGs, qDEGs, and  
 255 gDEGs are enriched for GO terms related to synaptic structure, function, and plasticity; neurotransmission;  
 256 and neurogenesis. (E) bDEGs, qDEGs, and gDEGs are enriched for EREs. Violin plots show cluster-specific  
 257 ERE-containing bDEG effects and feature plots below show the clusters (blue) in which each effect was  
 258 observed. GO terms followed by asterisks are abbreviated.

259 **Castle-building is associated with increased expression of genes that positively regulate**  
 260 **neurogenesis**

261 Most (6/7) clusters enriched for bDEGs did not exhibit building-associated IEG expression, consistent with a  
 262 large proportion of building-associated gene expression being driven by processes other than neuronal

263 excitation. Based on the enrichment of neurogenesis-related GO terms among bDEGs, we reasoned that  
264 neurogenesis and related processes (e.g. axon growth, dendritic branching) may underlie a large proportion  
265 of building-associated gene expression and be important for castle-building behavior. To further investigate  
266 this, we identified 87 genes with the GO annotation “positive regulation of neurogenesis” in both zebrafish  
267 and mice (“proneurogenic” genes, pNGs, Table S8). Six 1° (8\_Glut, 9\_Glut, 10\_Glut, 11\_Glut,  
268 15\_GABA/Glut, 4\_GABA) and ten aligned 2° neuronal clusters exhibited building-associated increases in  
269 pNG expression ( $hmp_{adj} \leq 0.020$  for all; Fig. 5A), including 5/7 clusters that exhibited a disproportionate  
270 number of bDEGs. The most significant building-associated pNG expression was observed in 8\_Glut (Fig.  
271 5B,  $hmp_{adj} = 1.23 \times 10^{-17}$ ), a cluster distinguished by markers of DI, the putative hippocampal homologue in fish.  
272 In contrast to building, gonadal-associated pNG expression was increased in 10.2\_Glut ( $hmp_{adj} = 0.010$ ) and  
273 decreased in 4.8\_GABA ( $hmp_{adj} = 0.0048$ ), and quivering was not associated with pNG expression in any 1° or  
274 2° cluster (Fig. 5A). Notably, the magnitude of effect ( $\beta$ ) estimates for building-associated pNG expression in  
275 2° clusters were always greater than in their “parent” 1° clusters, and many gene-defined subpopulations  
276 within clusters exhibited stronger building-associated pNG expression than their parent clusters. For  
277 example, within 15\_GABA/Glut, building-associated pNG estimates were >3x greater in subpopulations  
278 defined by expression of *adra2b* ( $\beta_{cond} = 0.188$ ) and *esr2* ( $\beta_{cond} = 0.154$ ) compared to 15\_GABA/Glut as a  
279 whole ( $\beta_{cond} = 0.048$ ). Among 2° clusters, the most extreme cases included 8.2\_Glut *drd4+*, 8.4\_Glut *htr4+*,  
280 9.1\_Glut *sstr5+*, 9.6\_Glut *htr4+*, 10.1\_Glut *ntrk2+* nuclei, and 11.1\_Glut *ntrk2+* nuclei ( $hmp_{adj} \leq 0.018$  for all).  
281 Among populations defined regardless of cluster, those exhibiting building-associated pNG expression were  
282 disproportionately defined by neuromodulatory receptor and ligand genes versus nTFs (receptors versus  
283 nTFs,  $q = 0.011$ ; ligands versus nTFs,  $q = 0.017$ ; FET), and those exhibiting the strongest building-associated  
284 pNG expression ( $\beta$ ) effects were disproportionately defined by neuromodulatory receptor genes ( $q = 0.011$ ;  
285 Fig. 5D), and by ERs in particular ( $q = 0.034$ ; Fig. 5E), consistent with a large body of literature supporting  
286 relationships between estrogen and neurogenesis (Diotel et al. 2013; Duarte-Guterman et al. 2015). These  
287 results highlight specific molecular systems (e.g. estrogen, serotonin, TrkB) as potential molecular systems  
288 involved in building-associated neurogenic changes.

## 289 **Castle-building is associated with putative hippocampal neuronal rebalancing**

290 During neurogenesis, new neurons differentiate into specific neuronal populations (Mira and Morante 2020;  
291 Götz and Huttnner 2005). We reasoned that if building is associated with cell type-specific neurogenesis, then  
292 it may be associated with changes in the relative proportions of specific neuronal populations. Building was  
293 associated with decreased proportions of 8.1\_Glut ( $q = 7.67 \times 10^{-4}$ ; Fig. 5F,G) and increased proportions of  
294 8.4\_Glut ( $q = 0.013$ ; Fig. 5F,H). The relative proportions of 8.4\_Glut and 8.1\_Glut were negatively correlated  
295 across subjects, such that greater proportions of 8.4\_Glut predicted lesser proportions of 8.1\_Glut ( $R = -0.50$ ,  
296  $p = 0.0012$ ; Fig. 5I). We hypothesized that this rebalancing could be mediated in part by a neurogenesis-  
297 mediated influx of new neurons into 8.4\_Glut. Indeed, 8.4\_Glut was among the 2° clusters that exhibited  
298 building-associated increases in pNG expression, and a more direct test showed that pNG expression in  
299 8.4\_Glut was positively associated with its relative proportion ( $R = 0.33$ ,  $p = 0.041$ ). Together, these data are  
300 consistent with a building-associated rebalancing of two excitatory neuronal populations mediated in part by  
301 increased influx of new neurons into 8.4\_Glut.

## 302 **Building is associated with changes in RGC biology**

303 RGCs are a primary source of new neurons in adult teleosts (Ganz and Brand 2016), and we therefore  
304 reasoned that signatures of neurogenesis may be downstream effects of changes in RGCs. We first  
305 investigated building-associated gene expression within RGCs (1.1\_RGC and 1.2\_RGC pooled). We  
306 identified 25 bDEGs that were collectively enriched for “neuron development” (top GO Biological Process,  
307  $q = 8.18 \times 10^{-4}$ ) it’s as well as “astrocytic glutamate-glutamine uptake and metabolism” (top Pathway,  $q = 0.0010$ )  
308 and “synapse” (top GO Cellular Component,  $q = 0.0015$ ). RGC bDEGs included *cyp19a1* (encodes brain  
309 aromatase, upregulated; Fig. 5J). Aromatase converts testosterone to brain-derived estrogen and has been  
310 previously linked to RGC function and neurogenesis (Pellegrini et al. 2016).

311 RGCs can occupy distinct functional states including quiescence, cycling, and neuronal differentiation  
312 (Jurisch-Yaksi, Yaksi, and Kizil 2020; Adolf et al. 2006; Labusch et al. 2020). We re-clustered RGCs  
313 (independently of other nuclei) into 11 subclusters (RGC<sub>0</sub>-RGC<sub>10</sub>; Fig. 5K). We next assigned each nucleus a  
314 quiescence, cycling, and neuronal differentiation score based on established marker genes (Table S9), and



315  
316  
317  
318  
319  
320  
321  
322  
323  
324  
325  
326  
327  
328  
329  
330  
331

analyzed building-associated differences in these scores across subclusters. Building was associated with decreased quiescence score in RGC<sub>2</sub> (hmp<sub>adj</sub>=0.010; Fig. 5L), but was not associated with quiescent, cycling, or neuronal differentiation score in any other subcluster. Analysis of building-associated gene expression across subclusters further revealed that 19/61 subcluster bDEGs were in RGC<sub>2</sub>, and 18/19 effects reflected building-associated downregulation. The strongest enrichment hit for RGC<sub>2</sub> bDEGs was GO Cellular Component “postsynaptic Golgi apparatus” (q=0.0011), a possible reflection of building-associated changes in neuron-glia communication in this subpopulation. *cyp19a1* was excluded from analysis in several subclusters because it was not detected in all build-control pairs; however, a targeted analysis revealed that building-associated increases in *cyp19a1* were driven by RGC<sub>3</sub> (hmp<sub>adj</sub>=0.018; Fig. 5M), a subpopulation distinguished by *lhx5* and *gli3*, both nTFs that regulate neurogenesis in mammals (Zhao et al. 1999; Hasenpusch-Theil et al. 2018). Lastly, because RGC subclusters strongly aligned with RGC functional states, we reasoned that building-associated changes in RGC function may also manifest as building-associated changes in RGC subcluster proportions. Indeed, building was associated with an increase in the relative proportion of RGC<sub>4</sub> (q=0.0017; Fig. 5N), a subcluster positioned between nuclei expressing markers of quiescence and nuclei expressing markers of cycling. These data support building-associated changes in RGC biology, and highlight RGC<sub>2</sub>, RGC<sub>3</sub>, and RGC<sub>4</sub> as candidate players in building-associated and RGC-mediated neurogenesis.

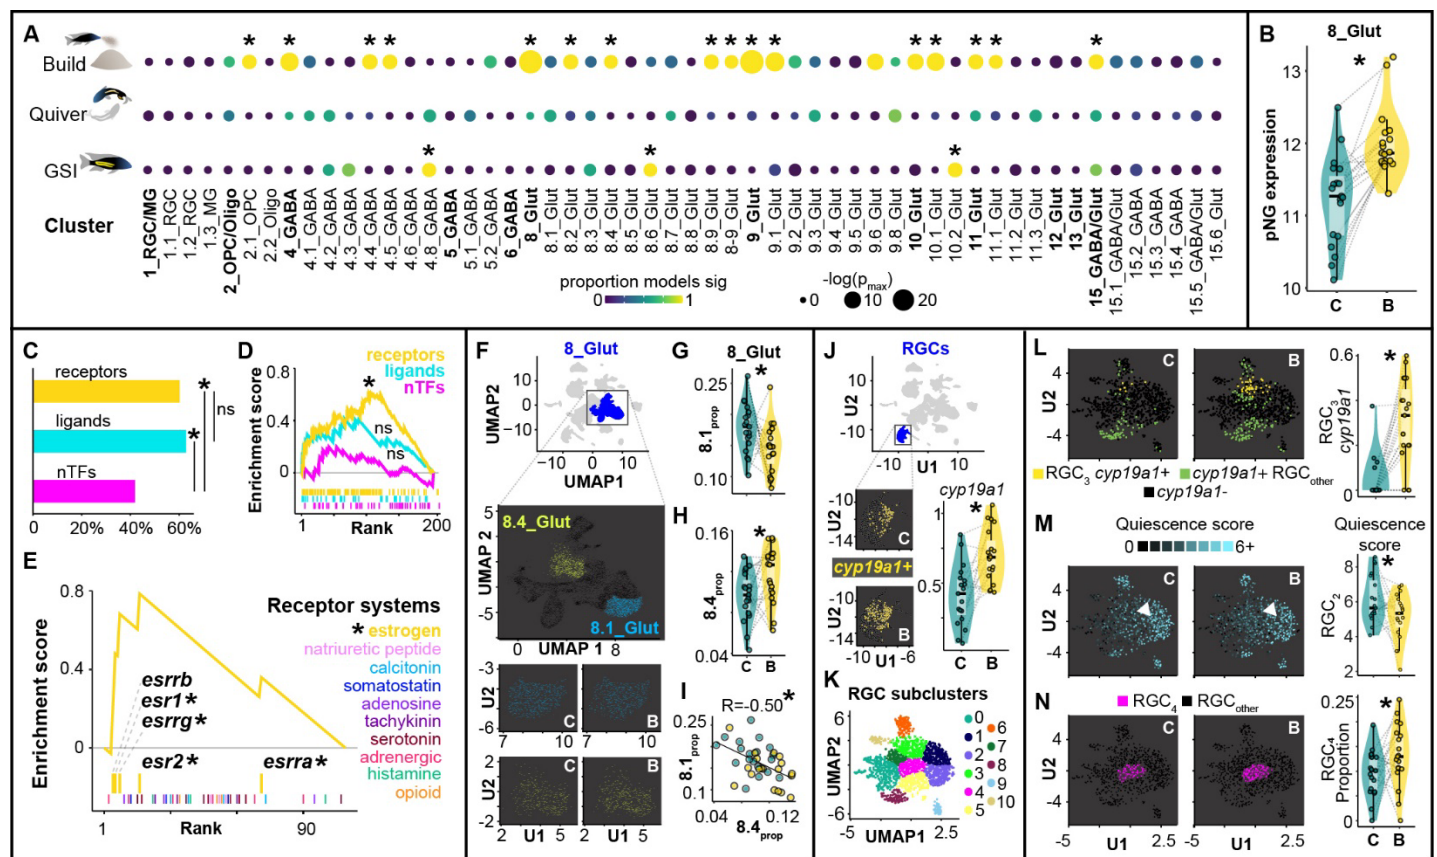

332

333  
334  
335  
336  
337  
338  
339  
340  
341  
342  
343

**Figure 5. Behavior and gonadal physiology are associated with transcriptional signatures of neurogenesis in distinct cell populations.** (A) Bower construction, but not quivering behavior, is associated with increased pNG expression in a large set of 1° and 2° clusters, whereas GSI is associated with increased and decreased pNG expression in just three 2° clusters. (B) The most significant building-associated pNG expression is observed in 8\_Glut. (C) Gene-defined populations that exhibit building-associated pNG expression are disproportionately defined by genes encoding receptors and ligands. (D) The strongest building-associated pNG expression tends to occur in populations defined by neuromodulatory receptors, particularly in ER-expressing populations (E). (F-I) Building is associated with a shift in the relative proportions of two 2° neuronal clusters within 8\_Glut. (J) RGCs exhibit building-associated *cyp19a1* expression. (K-N) reclustered RGC subpopulations exhibit building-associated *cyp19a1* expression (L), signatures of decreased quiescence (M), and increases in proportion (N).



344

## **Genes that have diverged in castle-building lineages are upregulated in reproductive contexts**

345  
346  
347  
348  
349  
350  
351  
352  
353  
354  
355  
356  
357  
358  
359  
360

Castle-building behavior has previously been linked to a ~19 Mbp region on Linkage Group 11 (LG11), within which genetic variants have diverged between closely-related castle-building and pit-digging lineages (York et al. 2018; Patil et al. 2021). Within this region, additional comparative genomics analyses revealed 165 “castle-divergent” genes (CDGs) that also showed signatures of divergence between castle-building lineages and more distantly-related species that do not build bowers (Fig. 6A; Table S10). CDGs were enriched for “carboxylic acid binding,” “small conductance calcium-activated potassium channel activity,” “ionotropic glutamate receptor signaling pathway,” “proximal/distal pattern formation,” “cell-cell junction,” and human brain disease-associated cytobands ( $q \leq 0.047$  for all, Table S5). CDGs were expressed at higher levels in the telencephalon compared to neighboring genes in the same 19Mbp region (~2.9x greater expression, permutation test,  $p = 1.42 \times 10^{-5}$ ) and compared to other genes throughout the genome (~2.6x greater expression,  $p = 1.77 \times 10^{-6}$ ). CDGs were also overrepresented among 1° and 2° cluster markers (versus neighboring LG11 genes,  $p \leq 1.66 \times 10^{-9}$  for both; versus all other genes,  $p \leq 1.43 \times 10^{-11}$  for both, FET), and among upregulated bDEGs, qDEGs, and gDEGs (versus neighboring LG11 genes,  $p \leq 0.0044$  for all; versus all other genes,  $p \leq 0.0066$  for all, FET; Fig. 6B). Taken together, these data support the behavioral significance of CDGs in the telencephalon, and more broadly that castle-building evolution has targeted genes that are upregulated during reproductive contexts.

361

## **Castle-divergent genes are enriched in quiescent RGC subpopulations**

362  
363  
364  
365  
366  
367  
368  
369  
370  
371  
372  
373  
374  
375  
376  
377  
378  
379

CDGs were most strongly enriched in non-neuronal clusters 2.1\_OPC, 1.1\_RGC, and 1.2\_RGC, followed by neuronal clusters 4.3\_GABA and 4.4\_GABA and gene-defined populations 5.2\_GABA *th+*, and 9\_Glut *hrh3+* (Fig. 6C; Table S11). We hypothesized that co-upregulation of subsets of CDGs in the same nuclei may drive cluster-specific enrichment patterns. A WGCNA based analysis revealed a module of 12 CDGs that were more strongly co-expressed than other CDGs (stronger correlation coefficients, Welch t-test,  $p = 8.83 \times 10^{-14}$ ; stronger silhouette widths, Welch t-test,  $p = 0.016$ ; Fig. 6D). Across clusters, the module was most strongly enriched in 1.2\_RGC ( $p_{\text{perm}} = 0$ , Cohen's  $d = 4.22$ ), and was less strongly enriched in 1.1\_RGC (Cohen's  $d = 2.86$ ; Fig. 2E), suggesting differences in expression among RGC subpopulations (Table S12). Among reclustered RGCs, CDG module expression mirrored expression of genetic markers of RGC quiescence (Fig. 2F). Indeed, the CDG module was positively associated with markers of RGC quiescence ( $R = 0.34$ ,  $p = 3.21 \times 10^{-52}$ ,  $p_{\text{perm}} = 0$ ; Fig. 6G); and was negatively associated with cycling score ( $R = -0.089$ ,  $p = 9.90 \times 10^{-5}$ ,  $p_{\text{perm}} = 0$ ) and neuronal differentiation score ( $R = -0.065$ ,  $p = 0.0048$ ;  $p_{\text{perm}} = 0$ ). The module was also enriched in subclusters RGC<sub>1</sub> ( $p_{\text{perm}} = 0.0196$ ) and RGC<sub>2</sub> ( $p_{\text{perm}} = 0.046$ ; Fig. 6H; Table S12), both of which selectively expressed genetic markers of RGC quiescence. Lastly, analysis of co-expression between the module and known TFs ( $n = 999$ ) identified *npas3* as the most strongly co-expressed TF with the module ( $R = 0.47$ ,  $q = 3.19 \times 10^{-100}$ ). *npas3* suppresses proliferation in human glioma, is strongly expressed in quiescent neural stem cells, and is downregulated during hippocampal neurogenesis in mice (Moreira et al. 2011; Shin et al. 2015). Together these data support that CDG module expression is positively related to RGC quiescence.

380  
381

## **An RGC subpopulation links evolution, behavior, and neuronal rebalancing in the putative fish hippocampal homologue**

382  
383  
384  
385  
386  
387  
388  
389  
390  
391  
392  
393  
394  
395

We hypothesized that the CDG module may regulate building-associated changes in RGC function and neurogenesis. In support of this, building was associated with a decrease in CDG module score in RGC<sub>2</sub> ( $\text{hmp}_{\text{adj}} = 0.027$ ; Fig. 6I), and an increase in CDG module score in RGC<sub>8</sub> ( $\text{hmp}_{\text{adj}} = 0.010$ ). *wdr73* was the only individual CDG module gene that exhibited building-associated expression and was selectively downregulated in RGC<sub>1</sub> and RGC<sub>2</sub> ( $\text{hmp}_{\text{adj}} \leq 4.54 \times 10^{-89}$  for both; RGC<sub>2</sub> effect in Fig. 6J). Taken together, these data support a building-associated downregulation of *wdr73* and the CDG module in RGC<sub>2</sub>, consistent with a departure from quiescence in this population. We hypothesized that building-associated changes in RGC biology may be related to building-associated neuronal rebalancing. Lasso, elastic net, and ridge regularization as well as mediation analysis supported *wdr73* expression in RGC<sub>2</sub> as the top candidate mediator of the building-associated rebalancing between 8.4\_Glut and 8.1\_Glut (Fig. 6K). Consistent with this, the 8.4\_Glut:8.1\_Glut ratio was predicted by RGC<sub>2</sub> CDG module score ( $R = -0.52$ ,  $p = 6.91 \times 10^{-4}$ ; Fig. 6L), *wdr73* expression ( $R = -0.62$ ,  $p = 3.31 \times 10^{-5}$ ; Fig. 6M), quiescent score ( $R = -0.42$ ,  $p = 0.0094$ ), and *npas3* expression ( $R = -0.52$ ,  $p = 8.20 \times 10^{-4}$ ). All of these relationships were observed within building males only (8.4\_Glut:8.1\_Glut ratio versus RGC<sub>2</sub> CDG module score,  $R = -0.51$ ,  $p = 0.024$ ; quiescent score,  $R = -0.42$ ,

396  
397  
398  
399  
400  
401  
402  
403  
404

$p=0.059$ ; versus RGC<sub>2</sub> *wdr73* expression,  $R=-0.59$ ,  $p=0.0074$ ; *npas3* expression  $R=-0.65$ ,  $p=0.0027$ ), but not within controls ( $p \geq 0.14$  for all). In contrast, none of these relationships were evident in RGC<sub>1</sub>, regardless of whether the analysis was conducted across all subjects ( $p \geq 0.13$  for all) or restricted to building males ( $p \geq 0.074$  for all). Anatomically distinct RGCs in the teleost telencephalon send processes into distinct brain regions (Fig. 6N). Spatial profiling revealed that RGC<sub>2</sub> was anatomically positioned along the pallial but not subpallial ventricular zone (Fig. 6O,P), consistent with a potential to supply neurons to dorsal pallial regions. 8.4\_Glut and 8.1\_Glut respectively mapped to ventral and dorsal DI, the putative fish homologue of the mammalian hippocampus (Fig. 6O,P). Taken together, these data support a relationship between building-associated expression of the CDG module in RGC<sub>2</sub> and hippocampal-like neuronal rebalancing.

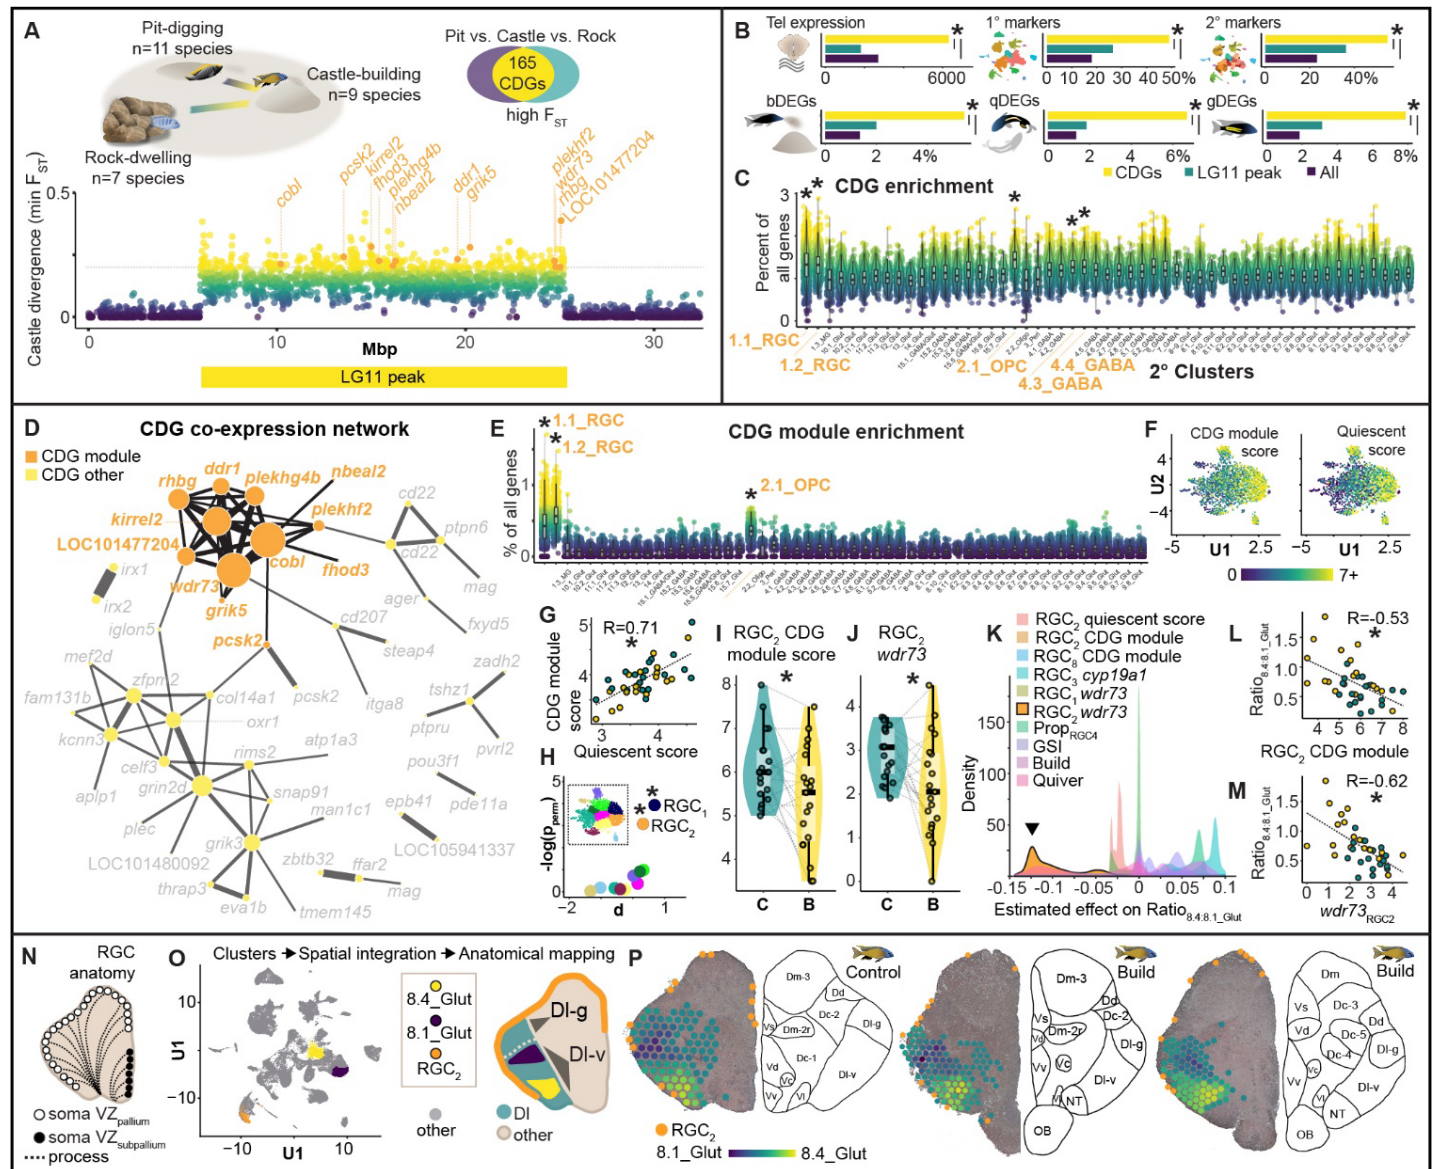

405

406  
407  
408  
409  
410  
411  
412  
413  
414  
415  
416

**Figure 6. Genomic signatures of castle-building evolution link behavior, RGC function, and hippocampal-like neuronal rebalancing.** (A) Comparative genomics identifies 165 CDGs. (B) CDGs are enriched in the telencephalon, among 1° and 2° cluster marker genes, and among bDEGs, qDEGs, and gDEGs. (C) CDGs are most strongly enriched in non-neuronal populations. (D) A CDG module ( $n=12$  genes) is strongly co-expressed across nuclei. (E) The CDG module is most strongly enriched in radial glia. (F) CDG module expression across RGC subclusters mirrors expression of quiescent markers. (G) CDG module expression is correlated with expression of RGC quiescence markers. (H) RGC<sub>1</sub> and RGC<sub>2</sub> are enriched for the CDG module. (I) RGC<sub>2</sub> exhibits building-associated decreases in expression of the CDG module and *wdr73* in particular (J). (K) *wdr73* expression in RGC<sub>2</sub> is the strongest predictor of neuronal rebalancing between 8.4\_Glut and 8.1\_Glut. (L-M) CDG module and *wdr73* expression are strongly associated with building-associated neuronal rebalancing between 8.4\_Glut and 8.1\_Glut. (N) RGCs differ in morphology,



417 function, and anatomical distribution (e.g. pallial versus subpallial ventricular zones). (O) Spatial profiling  
418 enables neuroanatomical mapping of RGC2, 8.1\_Glut, and 8.4\_Glut. (P) RGC2 (orange dots) aligned with  
419 pallial but not subpallial VZ, and 8.1\_Glut versus 8.4\_Glut aligned with dorsal versus ventral DI-v,  
420 respectively.

## 421 **DISCUSSION**

422  
423 The diversity of social behaviors in nature is an opportunity to discover organizing principles by which  
424 conserved biological systems generate variable neural and behavioral responses to social stimuli (Johnson  
425 and Young 2018). The ability to functionally profile many cell populations in under- and unstudied behavioral  
426 and species systems will be a boon to this endeavor. Here we integrated snRNA-seq with comparative  
427 genomics and automated behavioral analysis to systematically investigate the neurobiological substrates of  
428 castle-building in *Mchenga conophoros*. We first charted the cellular diversity of the telencephalon, and then  
429 functionally profiled behavior- and gonadal-associated gene expression as well as genomic signatures of  
430 behavioral evolution across clusters. Our analyses supported building-associated changes in cell type-  
431 specific neuronal excitation, gene expression, neurogenesis, and glial function. Multiple lines of evidence  
432 converged on estrogen, neurogenesis, 8\_Glut and 9\_Glut, and RGC-mediated hippocampal-like neuronal  
433 rebalancing as top candidate regulators of castle-building behavior.  
434

### 435 **Signatures of neuronal excitation reveal behavioral specificity and populations activated during** 436 **building**

437 Different social behaviors are regulated by distinct neural circuits and/or circuit activities in the brain  
438 (Newman 1999; Goodson 2005; Amadei et al. 2017; Kimchi, Xu, and Dulac 2007; Dulac, O'Connell, and Wu  
439 2014). However, most tools cannot functionally profile many heterogeneous cell populations and  
440 simultaneously track their biological identities. Three studies in mice have supported the promise of  
441 sn/scRNA-seq technologies for mapping behavior-associated IEG expression (Lacar et al. 2016; Moffitt et al.  
442 2018; Y. E. Wu et al. 2017); however, all three studies were conducted in the same genetically inbred  
443 C57BL6/J mouse strain, and thus cells could not be matched back to individuals after pooling. In our study,  
444 we leveraged natural genetic variation among individuals to trace ~34,000 nuclei back to 19 actively building  
445 and 19 control males. This allowed us to identify building-associated signals while simultaneously accounting  
446 for variance explained by other behavioral and biological factors that co-varied with building. Our analysis  
447 revealed novel IEG-like genes and distinct building-, quivering-, and GSI-associated signatures of neuronal  
448 excitation across cell populations. The only cluster exhibiting building-associated IEG expression was 9\_Glut.  
449 9\_Glut was distinguished by genetic markers of Dd, a region that innervates DI in a many-to-one fashion in  
450 other fish, mirroring the conserved “pattern separator” circuit organization of hippocampal cornu ammonis  
451 (CA) subregions and the dentate gyrus in mammals (Elliott et al. 2017). *ntrk2*+ nuclei also exhibited building-  
452 associated IEG expression, highlighting the TrkB system as a candidate player in castle-building. TrkB is a  
453 receptor that transduces activity-dependent signals into downstream modulation of neuronal differentiation,  
454 morphogenesis, survival, and long term potentiation (LTP) (Badurek et al. 2020; Lipsky and Marini 2007).  
455 Consistent with this, *ntrk2*+ nuclei also exhibited both building-associated pNG expression, suggesting this  
456 molecular pathway may link building-associated circuit activity to building-associated neuronal plasticity. The  
457 only other population that exhibited both building-associated IEG and pNG expression was defined by  
458 expression of *cckbr* (encodes Cholecystokinin B Receptor). Interesting, this receptor has recently been linked  
459 to NMDA receptor-mediated LTP and hippocampal neurogenesis in mice (Asrican et al. 2020; Chen et al.  
460 2019).

### 461 **A role for neurogenesis in the evolution and expression of social behavior**

462 Multiple analyses supported neurogenesis as a top candidate and central player in castle-building behavior.  
463 Building was associated with upregulation of genes (bDEGs) related to neurogenesis as well as increases in  
464 pNG expression across clusters and gene-defined populations. Many pNGs regulate morphogenic processes  
465 integral to neuronal differentiation but that can also occur independently in mature neurons (e.g. axon growth,  
466 dendritic arborization, and/or dendritic spine formation). Thus, one potential explanation for these data is that  
467 building triggers cell type-specific forms of neuronal plasticity, similar to other forms of learning and behavior  
468 in rodents (Lai, Adler, and Gan 2018; Villanueva Espino, Silva Gómez, and Bravo Durán 2020; Hofer et al.  
469 2009). Notably, building was associated with strong increases in pNG expression in both 8\_Glut and 8.4\_Glut



470 specifically, and with shifts in the relative proportions of 8.4\_Glut and 8.1\_Glut. These two populations  
471 mapped to different subregions of the putative fish hippocampal homologue, consistent with a growing body  
472 of literature demonstrating the importance of the hippocampus in social and spatial behaviors in mammals.  
473 Because neurogenesis is not a rapid process, it is difficult to interpret how neuronal rebalancing may be  
474 explained by behavior in recent hours. One possibility is that recent building in our paradigm was correlated  
475 with recent building spanning multiple previous days, and that these signals reflected longer-term and  
476 sustained changes in neurogenesis over the full course of building. Within this framework, it is intriguing to  
477 speculate that the rebalancing may be related to spatial representations of the bower structure and/or the  
478 territory, which need to be updated in the lab and in the wild. Lastly, building-associated neurogenesis was  
479 further supported by multiple signals in radial glia, including signals that we traced from genomic signatures  
480 of castle-building evolution, a topic we will return to later. Together our data suggest that programs underlying  
481 cell type-specific neurogenesis may have been integral to the evolution of castle-building behavior, and may  
482 also be important for its active expression. More broadly, these results fit with a large body of work showing  
483 changes in brain region-specific neurogenesis in other social and reproductive contexts across species  
484 (Walton, Pariser, and Nottebohm 2012; Bedos, Portillo, and Paredes 2018; Almlil and Wilczynski 2012;  
485 Balthazart and Ball 2016; Maruska, Carpenter, and Fernald 2012; Dunlap, Chung, and Castellano 2013; Lévy  
486 et al. 2017).

### 487 **Estrogenic substrates of male social behavior**

488 Estrogen is a female gonadal steroid hormone that can be synthesized in the male brain via conversion of  
489 testosterone to estrogen by aromatase (L. R. Nelson and Bulun 2001). In the brain, estrogen can exert its  
490 effects at multiple levels, for example by regulating gene transcription (via EREs), neuronal excitability,  
491 synaptic plasticity, neurogenesis, and G-protein coupled receptor signaling (Kelly and Rønnekleiv 2009).  
492 Multiple lines of evidence supported a potential role for estrogen in the neural coordination of building. First,  
493 bDEGs (as well as qDEGs and gDEGs) contained canonical EREs, consistent with a role for estrogen in  
494 modulating building-associated gene transcription. Out of all GO terms, ERE-containing bDEGs were most  
495 strongly enriched for “Schaffer collateral - CA1 synapse” (driven by building-associated expression of *cacng2*,  
496 *ppp3ca*, *ptprd*, *ptprs*, and *l1cam*), a deeply studied hippocampal synapse involved in associative learning and  
497 spatial memory in mice (Nakazawa et al. 2004; Soltesz and Losonczy 2018). In mice, estrogen increases the  
498 magnitude of long-term potentiation at this synapse (C. C. Smith, Vedder, and McMahon 2009). It is  
499 interesting to speculate that estrogen may regulate plasticity at a conserved hippocampal circuit motif during  
500 castle-building behavior. Second, building-associated increases in pNG expression were strongest in  
501 populations defined by neuromodulatory receptor genes, and were stronger in populations defined by ERs  
502 (*esr1*, *esr2*, *esrra*, *esrrb*, *esrrg*) compared to other receptor families, consistent with previous reports of  
503 estrogen-mediated neural plasticity in the mammalian forebrain (Barha and Galea 2010; Brinton 2009;  
504 Srivastava and Penzes 2011). Third, building was associated with strong increases in aromatase expression  
505 in RGCs, an effect that was driven most strongly by RGC<sub>3</sub>. These data thus identify a molecular and cellular  
506 pathway that may coordinate building-associated effects of estrogen on brain gene expression, neural circuit  
507 structure and function, and male social behavior, consistent with previous work demonstrating estrogenic  
508 regulation of male social behaviors in diverse lineages (M. V. Wu et al. 2009; Huffman, O’Connell, and  
509 Hofmann 2013; Sonoko Ogawa et al. 2020; Ervin et al. 2015).

### 510 **An evolutionarily divergent gene module links stem-like glia to neuronal rebalancing and behavior**

511 Appreciation of the importance of glial cells is surging in behavioral neuroscience, with a growing body of  
512 work indicating their fundamental roles in synaptic communication, plasticity, learning, memory, behavior, and  
513 psychiatric disease (Santello, Toni, and Volterra 2019; Kastanenka et al. 2020; Nagai et al. 2021; Yu et al.  
514 2018). In addition to building-associated aromatase expression in RGCs, we observed building-associated  
515 changes in RGC subpopulation-specific gene expression, relative proportions, and signatures of quiescence.  
516 Remarkably, comparative genomic analyses across a large number of castle-building, pit-digging, and  
517 outgroup rock-dwelling species further converged on the importance of RGCs in castle-building behavior,  
518 raising the possibility that transcriptional specializations in glia have served as a primary substrate in castle-  
519 building evolution. A module of 12 CDGs showed especially strong co-expression and mapped to RGC  
520 subpopulations bearing transcriptional signatures of RGC “stem-like” quiescence. Expression of this module  
521 was tightly linked with expression of genetic markers of RGC quiescence and *npas3*, a TF that regulates  
522 proliferation of human glia (Moreira et al. 2011). Remarkably, building was associated with downregulation of

523 both the CDG module (particularly *wdr73*), markers of quiescence, and *npas3* in RGC<sub>2</sub>. Furthermore, lasso,  
524 elastic net, and ridge regression combined with mediation analysis identified building-associated decreases in  
525 expression of *wdr73* as the strongest predictor and the only significant mediator of building-associated  
526 neuronal rebalancing. Interestingly, one study in human epithelial cells found that suppressed *wdr73*  
527 expression was most strongly associated with increased expression of *ccnd1* (Tilley et al. 2021), an  
528 established marker of proliferation in RGCs/neural stem cells in vertebrates (Lukaszewicz and Anderson  
529 2011; Zhang et al. 2021). Spatial profiling further showed that both neuronal populations localized to DI, the  
530 putative fish homologue of the hippocampus. Together, these data support a model whereby castle-building  
531 evolved in part by modifying gene regulatory networks that control RGC quiescence and cell type-specific  
532 neurogenesis within the putative fish hippocampus.

533 The CDG module resides in a 19 Mbp genomic region that exhibits signals of divergence mirroring those  
534 reported for chromosomal inversions in other species systems (Lamichhane et al. 2016; da Silva et al. 2019;  
535 Tuttle et al. 2016; Corbett-Detig and Hartl 2012; Roesti et al. 2015; Maney et al. 2020; Berg et al. 2017). It is  
536 thought that inversions can facilitate rapid evolution by protecting large-scale and adaptive cis-regulatory  
537 landscapes and multi-allele haplotypes (“supergenes”) from recombination (Schaal, Haller, and Lotterhos  
538 2022; Hoffmann and Rieseberg 2008; Kirkpatrick and Barton 2006; Villoutreix et al. 2021). Evidence for the  
539 importance of inversions in phenotypic evolution has been shown in diverse lineages spanning flowers and  
540 humans (Huang and Rieseberg 2020; Stefansson et al. 2005). Two recent studies in the ruff and white-  
541 throated sparrows further support that inversions may shape social behavioral evolution in diverse lineages  
542 (Merritt et al. 2020; Purcell et al. 2014; Küpper et al. 2016). In our data, four genes in the CDG module,  
543 including *wdr73*, are immediately proximate to one end of the 19 Mbp region exhibiting strong behavior-  
544 associated divergence. It is therefore intriguing to speculate that these genes reside near an inversion “break  
545 point” region with a divergent cis-regulatory architecture in castle-building lineages. Future work is needed to  
546 determine if an inversion has shaped cis-regulatory expression of these genes, RGC function, and the  
547 evolution of castle-building behavior in Lake Malawi cichlid fishes.

## 548 **LIMITATIONS OF THE STUDY**

549 The molecular readout in this study was nuclear RNA which may not reflect protein function, for example due  
550 to post-transcriptional regulation. Because nuclear RNA can only be captured at a single time point within  
551 each individual, temporal analysis of decision-making making behaviors during building was limited. This  
552 study only profiled the telencephalon, and other brain regions may play critical roles in castle-building. Lastly,  
553 firing properties and circuit connections among populations is not determined by snRNA-seq, and thus future  
554 experiments are required to determine the behavioral roles of specific neural circuits.

## 555 **ACKNOWLEDGEMENTS**

556 We thank our collaborators Ashley Parker and Drs. Swantje Graetsch, Manuel Stemmer, and Herwig Baier  
557 for valuable feedback during the early stages of the project; Dr. Nicholas Johnson for suggestions regarding  
558 statistical analysis of IEG co-expression; Cristina Baker for her critical role in initial development of spatial  
559 transcriptomics wetlab pipelines; and the Georgia Tech Petit Institute Genome Analysis and Molecular  
560 Evolution Cores for their integral roles in sample processing and sequencing, respectively. This work was  
561 supported in part by NIH R01GM101095 to J.T.S., NIH F32GM128346 to Z.V.J., NIH R35 GM139594 to  
562 P.T.M., NSF Graduate Research Fellowship DGE-2039655 to T.J.L., and Human Frontiers Science Program  
563 RGP0052/2019 to J.T.S.

## 564 **CONTRIBUTIONS**

565  
566 General: Z.V.J. initially conceived of the experiment and Z.V.J., J.T.S, and B.E.H. developed and designed it.  
567 Z.V.J. and B.E.H. performed all wetlab work (see details below under “Wetlab”). T.J.L. pre-processed  
568 behavioral and depth data, including in part spatial and temporal registration of both data streams and  
569 temporal anchoring to experimental endpoints. G.W.G. pre-processed snRNA-seq, DNA-seq, and spatial  
570 transcriptomics data. Z.V.J. and G.W.G. performed downstream data analysis (see details below under  
571 “Drylab”). B.E.H. matched snRNA-seq data to published neuroanatomical expression profiles (see details  
572 below under “Drylab”). Z.V.J. took the lead on writing the manuscript with critical feedback from G.W.G.,  
573 J.T.S., B.E.H., and P.T.M. Z.V.J took the lead on designing and creating figures with contributions from

574 B.E.H., G.W.G., and T.J.L., and with critical feedback from G.W.G., J.T.S., B.E.H., P.T.M., and T.J.L. J.T.S.  
575 mentored and funded Z.V.J., B.E.H., and G.W.G., and P.T.M mentored and funded T.J.L on the project.  
576 J.T.S. funded snRNA-seq, DNA-seq, and spatial transcriptomics experiments.

577

578 Wetlab: Z.V.J. and B.E.H. developed and optimized a single nucleus isolation protocol for cichlid  
579 telencephala. Z.V.J. and B.E.H. performed all behavioral assays, surgeries, and downstream nuclei isolations  
580 for snRNA-seq. Z.V.J. performed DNA isolations for matching nuclei to subjects. B.E.H. performed all  
581 behavior assays for spatial transcriptomics. Z.V.J. and B.E.H. performed surgeries for spatial transcriptomics.  
582 B.E.H. performed all downstream wetlab work for spatial transcriptomics. The Petit Institute Genome Analysis  
583 Core at GT performed library preparation for snRNA-seq, DNA-seq, and spatial transcriptomics. The Petit  
584 Institute Molecular Evolution Core at GT performed sequencing for snRNA-seq, DNA-seq, and spatial  
585 transcriptomics.

586

587 Drylab: Z.V.J. performed clustering and cluster marker analysis. B.E.H. systematically surveyed the literature  
588 to determine conserved neuroanatomical expression patterns of ligand, receptor, nTF, and other cell type-  
589 specific marker genes in the teleost telencephalon. B.E.H., G.W.G, and Z.V.J. collaboratively identified  
590 markers of RGC quiescence, cycling, and neuronal differentiation. Z.V.J. and G.W.G. collaboratively  
591 developed many analytical approaches. Z.V.J. conducted behavioral, IEG co-expression, IEG, DEG, pNG,  
592 cell proportion, and gene set enrichment (for biological categories) analyses. G.W.G. matched nuclei to  
593 subjects and conducted comparative genomics, gene orthologue calling, ERE detection, gene module  
594 detection, and cluster enrichment (for gene lists) analyses. G.W.G. performed spatial integration of clusters  
595 and B.E.H. matched spatial transcriptomic profiles to brain regions.

596



## 597 STAR METHODS

### 598 EXPERIMENTAL MODEL AND SUBJECT DETAILS

599 All cichlids (species *Mchenga conophoros*) used in this study were fertilized and raised into adulthood (>180  
600 days) in the Engineered Biosystems Building cichlid aquaculture facilities at the Georgia Institute of  
601 Technology in Atlanta, GA in accordance with the Institutional Animal Care and Use Committee guidelines  
602 (IACUC protocol number A100029). This colony was originally derived from wild-caught populations collected  
603 in Lake Malawi. All experimental animals were collected as fry at approximately 14 days post-fertilization from  
604 mouthbrooding females and were raised with broodmates on a ZebTec Active Blue Stand Alone system. At  
605 approximately 60 days post-fertilization, animals were transferred to 190-L (92 cm long x 46 cm wide x 42 cm  
606 tall) glass aquaria and were housed in social communities (20-30 mixed-sex individuals) into adulthood.  
607 Environmental conditions of aquaria were similar to those of the Lake Malawi environment; subjects were  
608 maintained on a 12-h:12-h light:dark cycle with full lights on between 8am-6pm Eastern Standard Time (EST)  
609 and dim lights on for 60 minutes between light-dark transition (7am-8am and 6pm-7pm EST) in pH=8.2,  
610 26.7°C water and fed twice daily (Spirulina Flake; Pentair Aquatic Ecosystems, Apopka, FL, U.S.A.). All tanks  
611 were maintained on a central recirculating system. Reproductive adult subject males (age 6-14 months post-  
612 fertilization, n=38) were visually identified from home tanks based on nuptial coloration and expression of  
613 classic courtship behaviors (i.e. chasing/leading, quivering). Reproductive adult stimulus females were  
614 visually identified from home tanks based on distension of the abdomen (caused by ovary growth) and/or  
615 buccal cavity (caused by mouthbrooding).

### 616 METHOD DETAILS

#### 617 *Behavior tanks*

618 Behavior tanks were equipped with LED strip lighting synced with external room lighting to minimize large  
619 shadows and maximize consistency in video data used for action recognition (10-h:14-h light:dark cycle).  
620 Sand (Sahara Sand, 00254, Carib Sea Inc.; ACS00222) was contained within a 38.1 cm long x 45.6 cm wide  
621 section of each tank and separated from the rest of the aquarium by a custom 45.6 cm wide x 17.8 cm tall x  
622 0.6 cm thick transparent acrylic barrier secured with plastic coated magnets (1.25 cm wide x 2.5 cm tall x 0.6  
623 cm thick; BX084PC-BLK, K&J Magnetics, Inc.). This design ensured that all fish could freely enter and leave  
624 the enclosed sand tray region throughout the trial. At the start of the trial, the smoothed sand surface lay  
625 approximately 29.5 cm directly below a custom-designed transparent acrylic tank cover (38.1 cm long x 38.1  
626 cm wide x 3.8 cm tall) that directly contacted the water surface to eliminate rippling for top-down depth  
627 sensing and video recordings.

#### 628 *Behavior assays*

629 Subject males were introduced to behavioral tanks containing sand and four reproductive adult age- and size-  
630 matched stimulus females of the same species. Broods were collected from all mouthbrooding females prior  
631 to introduction of subject males to behavior tanks. Prior to behavioral trials, each male was allowed to initiate  
632 castle-building to 1) confirm capacity and motivation to build and 2) minimize potential confounding effects of  
633 “novelty” on brain gene expression that may be caused by the male’s first experience building. After building  
634 was confirmed during the initial “pre-trial” period, the sand surface in each behavioral tank was smoothed  
635 shortly before lights off, and an automated depth sensing and video recording protocol was initiated as  
636 previously described using a Raspberry Pi 3 mini-computer (Raspberry Pi Foundation) (Johnson, Arrojjwala,  
637 et al. 2020). Briefly, this system uses 1) a Microsoft Xbox Kinect Depth sensor to track depth change across  
638 the sand surface every five minutes, enabling analysis of the developing bower structure over time, and 2) a  
639 Raspberry Pi v2 camera to record 10 hours of high-definition video data daily. The system regularly uploads  
640 depth change updates to a Google Documents spreadsheet, enabling real-time, remote monitoring of bower  
641 construction activity in each tank. Following each trial, a trained 3D Residual Network was used to predict  
642 male building and quivering behaviors from video data as previously described (Long et al. 2020).

#### 643 *Tissue sampling*

344 Actively constructing males (n=19) were identified through remote depth change updates and were collected  
345 between 11am-2pm EST (3-5 h after full lights-on and feeding) to control for potential effects of circadian  
346 rhythm, feeding, hunger, and anticipation of food on brain gene expression. At the same time, a neighboring  
347 male that was not constructing a bower (nor had initiated construction) but could also freely interact with four  
348 females and sand, was also collected (“control”, n=19). Immediately following collection, subjects were  
349 rapidly anesthetized with tricaine for rapid brain extraction, measured for standard length (SL, distance  
350 measured from snout to caudal peduncle) and body mass (BM), and rapidly decapitated for brain extraction.  
351 Telencephala (including olfactory bulbs) were dissected under a dissection microscope (Zeiss Stemi DV4  
352 Stereo Microscope 8x - 32x, 000000-1018-455), in Hibernate AB Complete nutrient medium (HAB; with 2%  
353 B27 and 0.5 mM Glutamax; BrainBits) containing 0.2 U/μl RNase Inhibitor (Sigma). Immediately following  
354 dissection telencephala were rapidly frozen on powdered dry ice and stored at -80 °C. Testes were then  
355 surgically extracted and weighed to calculate gonadosomatic index (GSI=gonad mass/BM\*100) for each  
356 subject (subject information available in Table S8).

### 357 *Nuclei isolation*

358 Nuclei were isolated following a protocol adapted from (Martelotto 2020) and optimized for cichlid  
359 telencephala.

### 360 *snRNA-sequencing*

361 Suspensions of isolated nuclei were loaded onto the 10x Genomics Chromium Controller (10x Genomics) at  
362 concentrations ranging from 400-500 nuclei/ul with a target range of 3,000–4,000 nuclei per sample.  
363 Downstream cDNA synthesis and library preparation using Single Cell 3' GEM, Library and Gel Bead Kit v3.1  
364 and Chromium i7 Multiplex Kit were performed according to manufacturer instructions (Chromium Single Cell  
365 3' Reagent Kits User Guide v3.1 Chemistry, 10X Genomics). Sample quality was assessed using high  
366 sensitivity DNA analysis on the Bioanalyzer 2100 system (Agilent) and libraries were quantified using a Qubit  
367 2.0 (Invitrogen). Barcoded cDNA libraries were pooled and sequenced on the NovaSeq 6000 platform  
368 (Illumina) on a single flow cell using the 300-cycle S4 Reagent kit (2x150 bp paired-end reads; Illumina).

### 369 *DNA sequencing*

370 Genomic DNA was isolated from diencephalic tissue sampled from each test subject using a DNeasy Blood  
371 and Tissue Kit pipeline with a 60 min lysis time and without RNase A. The 260/280 nm absorbance ratio  
372 ranged from 1.91-2.10 across subjects. Libraries were prepared following a NEBNext Ultra II FS DNA Library  
373 Prep Kit for Illumina protocol. Libraries were sequenced on two NovaSeq 6000 lanes using 300-cycle SP  
374 Reagent Kits (2x150 bp paired-end reads; Illumina).

### 375 *Spatial transcriptomics*

376 Telencephala were microdissected from two size-matched build-control pairs of MC males (n=4 males total),  
377 embedded in cryomolds, flash frozen on dry ice, and stored at -80°C until further processing. Tissue was  
378 cryo-sectioned coronally at 10-μm thickness at -20°C (Cryostar NX70) and mounted onto pre-chilled Visium  
379 Spatial Gene Expression slides (10X Genomics). RNA quality (RIN > 7) was confirmed using an RNA 6000  
380 Nano Kit (Agilent). Spatial gene expression slides were processed following manufacturer instructions  
381 (Visium Spatial Gene Expression Reagent Kits User Guide, 10X Genomics). Barcoded cDNA libraries were  
382 sequenced on the NovaSeq 6000 platform (Illumina).

## 383 **QUANTIFICATION AND STATISTICAL ANALYSIS**

### 384 *Behavioral Analysis*

385 For all trials, 3D ResNet-predicted behaviors and structural change across the sand surface was analyzed  
386 over the 90 minutes preceding collection following the same general approach described previously  
387 ([Johnson, Arrojwala, et al. 2020](#)). Briefly, a smoothing algorithm was applied to remove depth change

388 attributable to technical noise, and small regions of missing data were recovered by spatial interpolation.  
389 Bowers were defined as any region within which one-thousand or more contiguous pixels (equivalent to ~10  
390 cm<sup>2</sup>) changed in elevation by more than 0.2 cm in the same direction (~2 cm<sup>3</sup> volume change total) based on  
391 previous analysis of depth change caused by non-building home tank activity (Johnson, Arrojwala, et al.  
392 2020). Depth change values were adjusted based on the cubed standard length of each subject male, to  
393 create a standardized measure of building activity (larger males have larger mouths and can scoop and spit a  
394 larger volume of sand). Action recognition was used to track the number, location, and timepoints of predicted  
395 bower construction behaviors (scoops, spits, and multiple events) and quivering behaviors over the same 90  
396 min period. The number of quivering events was log-normalized due to a single outlier (building) male with  
397 257 predicted quivering events (~5.9 standard deviations above the mean). Feeding behaviors were not  
398 analyzed because they can be performed by both males and females and we are not able to reliably attribute  
399 individual feeding events to the subject male.

700 For simplicity, we generated a single “Bower Activity Index” (BAI) metric to reflect overall building activity by  
701 first calculating the regression line between depth change and building events for each trial (n=38, R<sup>2</sup>=0.76).  
702 We then projected each male’s depth change and bower behavior values onto that line, with the lowest value  
703 (0 predicted building events, 0 above threshold depth change) being set to 0. BAI was calculated as the  
704 Euclidean distance along the regression line from the lowest value. BAI was used as a continuous measure  
705 of castle-building behavior throughout this study.

706 Differences in building, quivering, and GSI between groups were analyzed using a paired t-test in which  
707 behave and control subjects collected at the same time were treated as pairs.

#### 708 *snRNA-seq pre-processing and quality control*

709 FASTQ files were processed with Cell Ranger version 3.1.0 (10X Genomics). Reads were aligned to the  
710 *Maylandia zebra* Lake Malawi cichlid genome assembly (Conte et al. 2019) using a splice-aware alignment  
711 algorithm (STAR) within Cell Ranger, and gene annotations were obtained from the same assembly (NCBI  
712 RefSeq assembly accession: GCF\_000238955.4, M\_zebra\_UMD2a). Because nuclear RNA contains intronic  
713 sequence, there were included in the cellranger count step. Cell Ranger filtered out UMIs that were  
714 homopolymers, contained N, or contained any base with a quality score less than 10. Following these steps,  
715 Cell Ranger generated ten filtered feature-barcode matrices (one per pool) containing expression data for a  
716 total of 32,471 features (corresponding to annotated genes) and a total of 33,895 barcodes (corresponding to  
717 droplets and putative nuclei) that were used passed through additional quality control steps in the “Seurat”  
718 package in R. Examination of total transcripts, total genes, and proportion of mitochondrial transcripts were  
719 similar across all ten pools, and therefore the same criteria were used to remove potentially dead or dying  
720 nuclei from all pools. Barcodes associated with fewer than 300 total genes, fewer than 500 total transcripts,  
721 or greater than 5% (of total transcripts) mitochondrial genes were excluded from downstream analysis on this  
722 basis. This step filtered out a total of 20 (0.059%) barcodes. To reduce risk of doublets or multiplets,  
723 barcodes associated with more than 3,000 total genes or 8,000 total transcripts were also excluded. This step  
724 filtered out a total of 201 barcodes (0.59%). In total, 33,674 barcodes (99.34%) passed all quality control  
725 filters and were included in downstream analyses.

#### 726 *Dimensionality reduction*

727 In order to perform dimensionality reduction, we first identified 4,000 genes that exhibited the most variable  
728 expression patterns across nuclei using the FindVariableFeatures function in Seurat with the mean.var.plot  
729 selection method, which aims to identify variable features while controlling for the strong relationship between  
730 variability and average expression, and otherwise default parameters. Gene-level data was then scaled using  
731 the ScaleData function in Seurat with default parameters. To examine dimensionality, we first performed a  
732 linear dimensional reduction using the RunPCA command with the maximum possible number of dimensions  
733 (“dim” set to 50). We then used Seurat’s JackStraw, ScoreJackStraw, and JackStrawPlot functions to  
734 estimate and visualize the significance of the first 50 principal components (PCs), and the Elbow plot function  
735 to visualize the variance explained by the first 50 PCs. Because all 50 PCs were highly statistically significant,  
736 and no “drop off” was observed in variance explained across PCs, we used all 50 PCs for non-linear  
737 dimensional reduction (Uniform Manifold Approximation and Projection, UMAP) using the RunUMAP function



738 in Seurat. For RunUMAP, “min.dist” was set to 0.5, “n.neighbors” was set to 50, and “metric” was set to  
739 “euclidean”.

#### 740 *Clustering*

741 Prior to clustering, nuclei were embedded into a K nearest-neighbor (KNN) graph based on euclidean  
742 distance in UMAP space, with edge weights based on local Jaccard similarity, using the FindNeighbors  
743 function in Seurat (k.param=50, dims=1:2, prune.SNN=0). Clustering was then performed using Seurat’s  
744 FindClusters function using the Louvain algorithm with multilevel refinement (algorithm=2). This final step was  
745 performed twice using two different resolution parameters to generate both coarse- and fine-grained  
746 structural descriptions of the underlying data, facilitating investigation of both major cell types as well as  
747 smaller subpopulations. For more coarse-grained clustering (resolution=0.01) identified 15 1° clusters and  
748 fine-grained clustering (resolution=1.3) identified 53 2° clusters.

#### 749 *Cluster marker gene analysis*

750 The biological identities of specific clusters were investigated using a multi-pronged approach that  
751 incorporated unbiased analysis of cluster-specific marker genes as well as supervised examination of  
752 previously established marker genes. Cluster-specific “marker” genes were identified using the  
753 FindAllMarkers function in Seurat. Briefly, this function compares gene expression within each cluster to gene  
754 expression across all other clusters and calculates Bonferroni-adjusted p-values using a Wilcoxon rank sum  
755 test. Functional enrichment analysis of GO categories among cluster-specific marker genes was investigated  
756 by first converting cichlid gene names to their human orthologs and then performing functional enrichment  
757 analysis using ToppGene Suite with default parameters. Enrichment results that survived FDR-adjustment  
758 ( $q < 0.05$ ) were considered statistically significant. Established cell type-specific and neuroanatomical marker  
759 genes were identified from the literature (Table S2) and were intersected with the output from FindAllMarkers  
760 to generate further insight into the biological identity of clusters.

#### 761 *Assignment of nuclei to test subjects*

762 To match individual nuclei to individual test subjects, we used Demuxlet to match variants identified in  
763 snRNA-seq reads to variants identified from genomic sequencing of each subject (Kang et al. 2018). First,  
764 genomic DNA from every test subject was collected and sequenced. In total, 276.7 Gbp of sequenced reads  
765 were assigned quality scores  $\geq 30$  (91.4% of all reads). The corresponding FASTQ files were filtered and  
766 aligned to the M. zebra Lake Malawi cichlid genome umd2a assembly (NCBI RefSeq assembly accession:  
767 GCF\_000238955.4, M\_zebra\_UMD2a). The resulting bam file was sorted, duplicates removed, read groups  
768 added, and indexed using Picard tools. Variants were then called using GATK v4.1.8.1 HaplotypeCaller using  
769 the M. zebra umd2a reference genome. Based on pool, individual vcf files were merged, resulting in 10 files  
770 (one for each pool). These files were then filtered to retain only variants that varied among individuals in a  
771 pool. For each pool, only SNPs for which 1) at least one individual from the pool had a different genotype  
772 from the other individuals, and 2) no individuals had missing data, were used as input to Demuxlet. The  
773 number of SNPs used ranged from 112,385 to 357,177 with a mean of  $241,780 \pm 22,369$  per pool.

774 Next, variants were called from snRNA-seq reads following a similar pipeline. Reads from Cell Ranger’s  
775 output bam file were filtered for those that passed the quality control metrics described above using samtools  
776 v1.11. The resulting bam file was sorted, duplicates removed, read groups added, and indexed using Picard  
777 tools. Variants were then called using GATK HaplotypeCaller using the M. zebra umd2a reference genome  
778 and without the MappingQualityAvailableReadFilter to retain reads that were confidently mapped by Cell  
779 Ranger (MAPQ score of 255). The SNPs from the snRNA-seq reads and the genomic DNA were input to  
780 Demuxlet, which computed a likelihood estimation that each nucleus belongs to each individual in the pool.  
781 Nuclei were assigned to the individual test subject with the greatest probability estimated by Demuxlet.

#### 782 *Identification of IEG-like genes*

783 Three canonical IEGs (*c-fos*, *egr1*, *npas4*) were used to identify additional genes exhibited IEG-like  
784 expression across clusters. For each of these three IEGs, nuclei were split into IEG-positive versus IEG-  
785 negative nuclei within each of the 53 clusters. Within each cluster, differential gene expression was analyzed  
786 between IEG-positive versus IEG-negative nuclei using the FindMarkers function in Seurat, with  
787 “logfc.threshold” set to 0, and “min.pct” set to 1/57 (57 was selected as this was the number of nuclei in the  
788 smallest cluster). Within each cluster, any genes that did not meet this criterion were excluded and were  
789 assigned a p-value of 1. Because FindMarkers requires at least three nuclei to be present in both comparison  
790 groups, clusters that contained less than three IEG-positive nuclei were excluded. Genes that were detected  
791 in the majority of clusters, and that were significantly ( $p < 0.05$ ) upregulated in IEG-positive nuclei in the  
792 majority of those clusters were considered to be significantly co-expressed with each individual IEG. Genes  
793 that were significantly co-expressed with all three IEGs were used as IEG-like markers for downstream  
794 analyses of IEG-like expression.

## 795 *Differential IEG expression*

796 Building-, quivering-, and gonadal-associated IEG expression was analyzed in 1° and 2° clusters, gene-  
797 defined populations within 1° and 2° clusters, and gene-defined populations regardless of cluster. To do this,  
798 we calculated an IEG score for each nucleus, equal to the number of unique IEG-like genes ( $n=25$ )  
799 expressed. Building-, quivering-, and gonadal-associated differences in IEG score were analyzed using a  
800 beta-binomial model in which the number of IEG-like genes observed as well as the number of the IEG-like  
801 genes not observed were tracked as indicators of recent neuronal excitation. This analysis was performed  
802 using the ‘BBmm’ package in R ( $m=25$ ). Because castle-building, quivering, and GSI were correlated with  
803 one another, we analyzed expression using a sequence of beta-binomial mixed-effects models in which  
804 different pairwise combinations of predictor variables (building, quivering, and GSI) competed to explain  
805 variance in IEG score. These models also included nested random terms to account for variance explained  
806 by individual variation, pair, pool, and RNA isolation/cDNA library generation batch. Within this framework, we  
807 ran the following seven models, which allowed building (analyzed as either a binary or a continuous variable),  
808 quivering, and GSI to compete in all possible combinations to explain variance in IEG score:

- 809 1. IEG score ~ **BAI** + **log(quivering events)** + (*subject/pool/batch*) + (*subject/pair*)
- 810 2. IEG score ~ **BAI** + **GSI** + (*subject/pool/batch*) + (*subject/pair*)
- 811 3. IEG score ~ **BAI** + **log(quivering events)** + **GSI** + (*subject/pool/batch*) + (*subject/pair*)
- 812 4. IEG score ~ **Condition** + **log(quivering events)** + (*subject/pool/batch*) + (*subject/pair*)
- 813 5. IEG score ~ **Condition** + **GSI** + (*subject/pool/batch*) + (*subject/pair*)
- 814 6. IEG score ~ **Condition** + **log(quivering events)** + **GSI** + (*subject/pool/batch*) + (*subject/pair*)
- 815 7. IEG score ~ **log(quivering events)** + **GSI** + (*subject/pool/batch*) + (*subject/pair*)

816 We defined significant building-, quivering-, and gonadal-associated IEG effects as those in which 1) the raw  
817 p-value for the corresponding fixed effect (for building, BAI and condition; for quivering, log-normalized  
818 quivering; for gonadal, GSI) was significant ( $p < 0.05$ ) in every model, and 2) the harmonic mean p-value  
819 across models was significant after adjusting for multiple comparisons for all genes and populations analyzed  
820 ( $hmp_{adj} < 0.05$ ). To calculate the harmonic mean p-value, we used the “harmonicmean” package in R. Thus,  
821 building-associated IEG effects were significant (the raw p-value for the effect of “condition” and “BAI”  $< 0.05$ )  
822 in models 1-6, and if the harmonic mean p-value across models 1-6 was significant after adjusting for multiple  
823 comparisons across all cell populations.  
824  
825

## 826 *Building-, quivering-, and gonadal-associated gene expression*

827 Building-, quivering-, and gonadal-associated gene expression was analyzed within 1° and 2° clusters using  
828 a multiple linear mixed-effects regression approach with the “glmmSeq” package in R  
829 (<https://github.com/KatrionaGoldmann/glmmSeq>). Because castle-building, quivering, and GSI were  
830 correlated with one another, we analyzed expression using a sequence of linear mixed-effects regression  
831 models in which different pairwise combinations of predictor variables (building, quivering, and GSI)  
832 competed to explain variance in gene expression. These models also included nested random terms to  
833 account for variance explained by individual variation, pair, sample pool, and 10X Chromium run. Thus,  
834 sample size was equal to the number of individuals ( $n=38$ ), with many repeated observations being recorded

335 from each individual (equal to the number of nuclei sampled from that individual as assigned to the cluster  
336 being analyzed). Building was analyzed both as a continuous variable (BAI) and as a binary categorical  
337 variable (behave versus control).

338  
339 We defined bDEGS, qDEGs, and gDEGs as genes (within clusters) in which expression was significantly  
340 (raw  $p < 0.05$ ) associated with the corresponding fixed effect (for bDEGs, BAI and condition; for qDEGs, log-  
341 normalized quivering; for gDEGs, GSI) in every model, and additionally in which the harmonic mean p-value  
342 across models was significant after adjusting for multiple comparisons for all genes and all clusters (5% false  
343 discovery rate). For each model, dispersion was estimated for each gene using the “DESeq2” package in R,  
344 using parameters recommended for single cell datasets (fitType = “glmGamPoi”, minmu =  $1e-06$ ). Size  
345 factors for each gene were calculated using the “scrn” package in R, using default parameters, except that  
346 max.cluster.size was set to the number of nuclei assigned to the cluster being analyzed. Genes that were not  
347 observed in 19/19 pairs were excluded from analysis.

#### 348 *Estrogen response element detection*

349 Estrogen receptors are hormone-dependent transcription factors capable of regulating target gene  
350 expression by binding to specific DNA sequences called estrogen response elements (EREs). EREs can be  
351 easily identified by their prototypic motif of AGGTCA separated by a 3-base spacer (Ikeda, Horie-Inoue, and  
352 Inoue 2015). Genes with an ERE motif less than 25 kilobases away were found and the location of the ERE  
353 relative to the gene was recorded as either intragenic (ERE within the start site to the 3' polyA tail), promoter  
354 (ERE  $\leq$  5 kb upstream of the gene), or distal (all other locations less than 25 kb away from the gene). To  
355 identify the location of the ERE to the closest gene, bedtools v2.29.1 was used using the closest command.

#### 356 *Building-, quivering-, and gonadal-associated pNG expression*

357 Building-, quivering-, and gonadal-associated pNG expression was analyzed in 1° and 2° clusters, gene-  
358 defined populations within 1° and 2° clusters, and gene-defined populations regardless of cluster using the  
359 same general approach described for IEG expression, except that building-associated effects were defined  
360 as those that were significantly associated with condition in all models. Because we did not expect  
361 neurogenesis or associated cellular processes to proceed over 90-minute timescales, we did not additionally  
362 require effects to be significantly associated with BAI in all models.

#### 363 *Building-associated changes in cell proportions*

364 Behavior-associated differences in cell type-specific proportions were analyzed for 1° and 2° clusters with a  
365 binomial mixed-effects regression model using the glmer function within the “lmer” package in R. The model  
366 included condition, GSI, and quivering as fixed effects, and included a random term for individual variation. 1°  
367 cluster proportions were calculated as the proportion of all nuclei assigned to each 1° cluster, and 2° cluster  
368 proportions were calculated as the proportion of 1° “parent” cluster nuclei assigned to each 2° “daughter”  
369 cluster. Thus, each nucleus was treated as an observation with a binary outcome (either an instance of the  
370 target cluster or not) from an individual that could be explained by condition, quivering, or GSI. p-values were  
371 estimated using the ‘lmerTest’ package in R, and qvalues were calculated using the ‘qvalue’ package in R.  
372 Building-associated effects were defined as those that were significant after accounting for multiple  
373 comparisons across all clusters with a false discovery rate of 5% ( $q < 0.05$ ).

#### 374 *Cluster-specific enrichment of gene sets*

375 To test if genes associated with the evolution of bower construction behavior (identified through comparative  
376 genomics) were enriched in specific cell populations, we first calculated a “gene set score” for each nucleus,  
377 equal to the total number of unique behavioral evolution genes expressed. Because the gene set score could  
378 be impacted by the total volume of sequence data sampled from each nucleus, we divided the gene set score  
379 by the total number of unique genes expressed in each nucleus. To quantify enrichment, a Z-test was then  
380 used to compare “normalized” gene set scores for all nuclei within a cluster compared to all other nuclei. The  
381 distribution of the normalized values was assumed to be normal according to the central limit theorem and  
382 population standard deviation was approximated using sample standard deviation.



383 Secondly, the effect size, as measured by Cohen's d, of the results were compared to those of random gene  
384 lists. To prevent differences in overall amount of expression between random genes and genes of interest  
385 from skewing results, random genes lists were chosen that had approximately equal number of UMIs  
386 expressed as a whole to the genes of interest. This was achieved by first ranking all the genes from the  
387 highest number of UMIs expressed to the lowest. Next, for each gene of interest, a pool of 100 random genes  
388 were chosen that were ranked most closely to the gene of interest and were not a gene of interest  
389 themselves. Then, 10,000 random gene lists were created by choosing one gene at random from each pool.  
390 The enrichment test described above was then performed on the random gene lists. Finally, clusters that  
391 were significantly enriched for the genes of interest according to the process above and had significantly  
392 greater effect sizes than the 10,000 random gene lists were considered to be significant.

### 393 *RGC subclustering*

394 RGC subclusters were determined using the same general procedure used for clustering 1° and 2° clusters  
395 but restricted to only those nuclei assigned to 1.1\_RGC and 1.2\_RGC.

### 396 *Analysis of castle-associated genomic divergence*

397 In order to identify potential behavior-associated genomic variants, comparative genomic analyses were  
398 performed using genomic sequence data collected from 27 Lake Malawi cichlid species (Patil et al. 2021).  
399 Fixation indices ( $F_{ST}$ ) were calculated for polymorphic variants in two separate analyses using vcfTools  
400 v0.1.17. The first analysis compared pit-digging (N=11) versus castle-building (N=9) species, and the second  
401 compared rock-dwelling (N=7) versus castle-building (N=9) species. Variants for which sequence data was  
402 missing from 50% or more of species in either group were excluded from analysis.  $F_{ST}$  analyses were  
403 performed separately using the --weir-fst-pop and --fst-window-size 10000 flag to calculate  $F_{ST}$  across 10kb  
404 bins in vcfTools. Then, bins where  $F_{ST}$  was greater than 0.20 in the pit-castle comparison and 0.20 in the rock-  
405 castle comparison were kept. These thresholds are both greater than the minimum  $F_{ST}$  of FDR-adjusted  
406 significant bins. By creating these more strict thresholds we aimed to ensure that the selected bins were  
407 extremely divergent between castle-building and non-castle-building species. Additionally, a higher threshold  
408 was selected for the rock-castle than the pit-castle comparison because of the greater evolutionary distance  
409 and thus greater overall  $F_{ST}$ . Finally, genes that were within 25kb of these bins meeting these thresholds  
410 were identified using bcftools v1.11 with the closest command and the *M. zebra* genome as reference. Genes  
411 within 25kb of highly divergent pit-castle and rock-castle bins are referred to here as "castle-divergent".

### 412 *CDG co-expression and module analysis*

413 Modules of co-expressed CDGs were analyzed using weighted correlation network analysis (WGCNA) using  
414 the "WGCNA" v1.70-3 package in R. CDGs that were not observed in any nucleus were excluded from  
415 analysis. The normalized gene expression data for CDGs was used as the input gene expression matrix and  
416 the function pickSoftThreshold was used to determine the optimal soft-thresholding power. We determined  
417 the optimal soft-thresholding power to be 1 because it was the lowest power for which the scale-free topology  
418 fit index reached 0.90. Then an adjacency matrix was created from the input gene expression matrix using  
419 the adjacency function with power = 1, type = "signed" and otherwise default parameters. The adjacency  
420 matrix was used as the topological overlap matrix (TOM) and the dissimilarity matrix was calculated as  $1 -$   
421 TOM. To detect modules, k-means clustering was performed using all possible values of k and the results  
422 were compared to determine the optimal k. First, a distance matrix was constructed from the dissimilarity  
423 matrix produced by WGCNA using the dist function in R. Next, the function pam from the R package "cluster"  
424 v2.1.0 was used to cluster the distance matrix with diss = T, otherwise default parameters, and k set to the  
425 value that produced the highest average silhouette width for all genes. Briefly, silhouette width is a measure  
426 of the similarity of the genes within a module to the genes outside the module, and higher values indicate  
427 better clustering. We found that k=2, had the greatest average silhouette width. The strength of the module  
428 was evaluated using a two-sampled Welch t-test comparing the silhouette width and gene-gene correlations  
429 for CDGs within the module versus CDGs outside the module. To analyze the relationship between the CDG  
430 module and signatures of RGC quiescence, the correlation coefficient was calculated based the number of  
431 genes in the CDG module expressed in each nucleus versus the number of quiescent markers expressed in

332 each nucleus. We compared the correlation coefficient against a permuted null distribution by randomly  
333 shuffling the expression values of each gene in the module 10,000 times.

#### 334 *Spatial transcriptomic pre-processing and quality control*

335 Base Call files were demultiplexed into FASTQ files and processed with Space Ranger v1.3.1 (10X  
336 Genomics). Reads were aligned to the *M. zebra* umd2a reference assembly as described above for snRNA-  
337 seq (Conte et al. 2019). Following these steps, Space Ranger generated three filtered feature-barcode  
338 matrices containing expression data for a total of 32,471 features (corresponding to annotated genes). Spots  
339 with 0 UMIs were removed resulting in 6,707 spots used in downstream analysis.

#### 340 *Spatial integration of snRNA-seq clusters*

341 To predict locations of specific snRNA-seq identified clusters in spatial transcriptomics data, an 'anchor'-  
342 based integration workflow in Seurat was used. First, both the snRNA-seq and spatial data were normalized  
343 using the SCTransform in Seurat. Next, anchors were identified between the reference snRNA-seq and the  
344 query spatial data using FindTransferAnchors in Seurat, and a matrix of predictions scores was generated for  
345 each cluster in every spot using the TransferData function in Seurat. The maximum prediction score across  
346 clusters was not uniform, therefore we normalized the values between 0 and 1 in order to enable meaningful  
347 comparisons across cell types.  
348

349 **REFERENCES**

- 350 Adkins-Regan, Elizabeth. 2013. *Hormones and Animal Social Behavior*. Princeton University Press.
- 351 Adolf, Birgit, Prisca Chapouton, Chen Sok Lam, Stefanie Topp, Birgit Tannhäuser, Uwe Strähle, Magdalena  
352 Götz, and Laure Bally-Cuif. 2006. "Conserved and Acquired Features of Adult Neurogenesis in the Zebrafish  
353 Telencephalon." *Developmental Biology* 295 (1): 278–93.
- 354 Almeida, Olinda, Ana S. Félix, Gonçalo A. Oliveira, João S. Lopes, and Rui F. Oliveira. 2019. "Fighting  
355 Assessment Triggers Rapid Changes in Activity of the Brain Social Decision-Making Network of Cichlid Fish."  
356 *Frontiers in Behavioral Neuroscience* 13 (September): 229.
- 357 Almli, Lynn M., and Walter Wilczynski. 2012. "Socially Modulated Cell Proliferation Is Independent of Gonadal  
358 Steroid Hormones in the Brain of the Adult Green Treefrog (*Hyla Cinerea*)."  
359 *Brain, Behavior and Evolution* 79 (3): 170–80.
- 360 Alward, Beau A., Austin T. Hilliard, Ryan A. York, and Russell D. Fernald. 2019. "Hormonal Regulation of  
361 Social Ascent and Temporal Patterns of Behavior in an African Cichlid." *Hormones and Behavior* 107  
362 (January): 83–95.
- 363 Amadei, Elizabeth A., Zachary V. Johnson, Yong Jun Kwon, Aaron C. Shpiner, Varun Saravanan, Wittney D.  
364 Mays, Steven J. Ryan, et al. 2017. "Dynamic Corticostriatal Activity Biases Social Bonding in Monogamous  
365 Female Prairie Voles." *Nature* 546 (7657): 297–301.
- 366 Amenyogbe, Eric, Gang Chen, Zhongliang Wang, Xiaoying Lu, Mingde Lin, and Ai Ying Lin. 2020. "A Review  
367 on Sex Steroid Hormone Estrogen Receptors in Mammals and Fish." *International Journal of Endocrinology*  
368 2020 (February): 5386193.
- 369 Anderson, David J. 2016. "Circuit Modules Linking Internal States and Social Behaviour in Flies and Mice."  
370 *Nature Reviews. Neuroscience* 17 (11): 692–704.
- 371 Asrican, Brent, Josh Wooten, Ya-Dong Li, Luis Quintanilla, Feiran Zhang, Connor Wander, Hechen Bao, et  
372 al. 2020. "Neuropeptides Modulate Local Astrocytes to Regulate Adult Hippocampal Neural Stem Cells."  
373 *Neuron* 108 (2): 349-366.e6.
- 374 Bachevalier, Jocelyne, and Katherine A. Loveland. 2006. "The Orbitofrontal-Amygdala Circuit and Self-  
375 Regulation of Social-Emotional Behavior in Autism." *Neuroscience and Biobehavioral Reviews* 30 (1): 97–  
376 117.
- 377 Badurek, Sylvia, Marilena Griguoli, Aman Asif-Malik, Barbara Zonta, Fei Guo, Silvia Middei, Laura Lagostena,  
378 et al. 2020. "Immature Dentate Granule Cells Require Ntrk2/TrkB for the Formation of Functional  
379 Hippocampal Circuitry." *IScience* 23 (5): 101078.
- 380 Balthazart, Jacques, and Gregory F. Ball. 2016. "Endocrine and Social Regulation of Adult Neurogenesis in  
381 Songbirds." *Frontiers in Neuroendocrinology* 41 (April): 3–22.
- 382 Baran, Nicole M., and J. Todd Strelman. 2020. "Ecotype Differences in Aggression, Neural Activity and  
383 Behaviorally Relevant Gene Expression in Cichlid Fish." *Genes, Brain, and Behavior* 19 (6): e12657.
- 384 Barha, Cindy K., and Liisa A. M. Galea. 2010. "Influence of Different Estrogens on Neuroplasticity and  
385 Cognition in the Hippocampus." *Biochimica et Biophysica Acta* 1800 (10): 1056–67.
- 386 Bedos, M., W. Portillo, and R. G. Paredes. 2018. "Neurogenesis and Sexual Behavior." *Frontiers in*  
387 *Neuroendocrinology* 51 (October): 68–79.
- 388 Bendesky, Andres, Young-Mi Kwon, Jean-Marc Lassance, Caitlin L. Lewarch, Shenqin Yao, Brant K.  
389 Peterson, Meng Xiao He, Catherine Dulac, and Hopi E. Hoekstra. 2017. "The Genetic Basis of Parental Care  
390 Evolution in Monogamous Mice." *Nature* 544 (7651): 434–39.



- 391 Berg, P. R., B. Star, C. Pampoulie, I. R. Bradbury, P. Bentzen, J. A. Hutchings, S. Jentoft, and K. S.  
392 Jakobsen. 2017. "Trans-Oceanic Genomic Divergence of Atlantic Cod Ecotypes Is Associated with Large  
393 Inversions." *Heredity* 119 (6): 418–28.
- 394 Boender, Arjen J., and Larry J. Young. 2020. "Oxytocin, Vasopressin and Social Behavior in the Age of  
395 Genome Editing: A Comparative Perspective." *Hormones and Behavior* 124 (104780): 104780.
- 396 Brenowitz, Eliot A., and Harold H. Zakon. 2015. "Emerging from the Bottleneck: Benefits of the Comparative  
397 Approach to Modern Neuroscience." *Trends in Neurosciences* 38 (5): 273–78.
- 398 Brinton, Roberta Diaz. 2009. "Estrogen-Induced Plasticity from Cells to Circuits: Predictions for Cognitive  
399 Function." *Trends in Pharmacological Sciences* 30 (4): 212–22.
- 300 Chen, Xi, Xiao Li, Yin Ting Wong, Xuejiao Zheng, Haitao Wang, Yujie Peng, Hemin Feng, et al. 2019.  
301 "Cholecystokinin Release Triggered by NMDA Receptors Produces LTP and Sound-Sound Associative  
302 Memory." *Proceedings of the National Academy of Sciences of the United States of America* 116 (13): 6397–  
303 6406.
- 304 Conte, Matthew A., Rajesh Joshi, Emily C. Moore, Sri Pratima Nandamuri, William J. Gammerding, Reade  
305 B. Roberts, Karen L. Carleton, Sigbjørn Lien, and Thomas D. Kocher. 2019. "Chromosome-Scale Assemblies  
306 Reveal the Structural Evolution of African Cichlid Genomes." *GigaScience* 8 (4).  
307 <https://doi.org/10.1093/gigascience/giz030>.
- 308 Corbett-Detig, Russell B., and Daniel L. Hartl. 2012. "Population Genomics of Inversion Polymorphisms in  
309 *Drosophila Melanogaster*." *PLoS Genetics* 8 (12): e1003056.
- 310 Dias, Caroline M., and Christopher A. Walsh. 2020. "Recent Advances in Understanding the Genetic  
311 Architecture of Autism." *Annual Review of Genomics and Human Genetics* 21 (1): 289–304.
- 312 Diotel, Nicolas, Colette Vaillant, Cyril Gabbero, Svetlana Mironov, Alexis Fostier, Marie-Madeleine Gueguen,  
313 Isabelle Anglade, Olivier Kah, and Elisabeth Pellegrini. 2013. "Effects of Estradiol in Adult Neurogenesis and  
314 Brain Repair in Zebrafish." *Hormones and Behavior* 63 (2): 193–207.
- 315 Duarte-Guterman, Paula, Shunya Yagi, Carmen Chow, and Liisa A. M. Galea. 2015. "Hippocampal Learning,  
316 Memory, and Neurogenesis: Effects of Sex and Estrogens across the Lifespan in Adults." *Hormones and  
317 Behavior* 74 (August): 37–52.
- 318 Dulac, Catherine, Lauren A. O'Connell, and Zheng Wu. 2014. "Neural Control of Maternal and Paternal  
319 Behaviors." *Science (New York, N.Y.)* 345 (6198): 765–70.
- 320 Dunlap, Kent D., Michael Chung, and James F. Castellano. 2013. "Influence of Long-Term Social Interaction  
321 on Chirping Behavior, Steroid Levels and Neurogenesis in Weakly Electric Fish." *The Journal of Experimental  
322 Biology* 216 (Pt 13): 2434–41.
- 323 Elliott, S. Benjamin, Erik Harvey-Girard, Ana C. C. Giassi, and Leonard Maler. 2017. "Hippocampal-like  
324 Circuitry in the Pallium of an Electric Fish: Possible Substrates for Recursive Pattern Separation and  
325 Completion." *The Journal of Comparative Neurology* 525 (1): 8–46.
- 326 Ervin, Kelsy S. J., Jennifer M. Lymer, Richard Matta, Amy E. Clipperton-Allen, Martin Kavaliers, and Elena  
327 Choleris. 2015. "Estrogen Involvement in Social Behavior in Rodents: Rapid and Long-Term Actions."  
328 *Hormones and Behavior* 74 (August): 53–76.
- 329 Furth, W. R. van, G. Wolterink, and J. M. van Ree. 1995. "Regulation of Masculine Sexual Behavior:  
330 Involvement of Brain Opioids and Dopamine." *Brain Research. Brain Research Reviews* 21 (2): 162–84.
- 331 Gallant, Jason R., and Lauren A. O'Connell. 2020. "Studying Convergent Evolution to Relate Genotype to  
332 Behavioral Phenotype." *The Journal of Experimental Biology* 223 (Pt Suppl 1): jeb213447.

- 033 Gangopadhyay, Prabaha, Megha Chawla, Olga Dal Monte, and Steve W. C. Chang. 2021. "Prefrontal-  
034 Amygdala Circuits in Social Decision-Making." *Nature Neuroscience* 24 (1): 5–18.
- 035 Ganz, Julia, and Michael Brand. 2016. "Adult Neurogenesis in Fish." *Cold Spring Harbor Perspectives in*  
036 *Biology* 8 (7). <https://doi.org/10.1101/cshperspect.a019018>.
- 037 Goodson, James L. 2005. "The Vertebrate Social Behavior Network: Evolutionary Themes and Variations."  
038 *Hormones and Behavior* 48 (1): 11–22.
- 039 Götz, Magdalena, and Wieland B. Huttner. 2005. "The Cell Biology of Neurogenesis." *Nature Reviews.*  
040 *Molecular Cell Biology* 6 (10): 777–88.
- 041 Gutzeit, Vanessa A., Kyla Ahuna, Tabia L. Santos, Ashley M. Cunningham, Meghin Sadsad Rooney, Andrea  
042 Muñoz Zamora, Christine A. Denny, and Zoe R. Donaldson. 2020. "Optogenetic Reactivation of Prefrontal  
043 Social Neural Ensembles Mimics Social Buffering of Fear." *Neuropsychopharmacology: Official Publication of*  
044 *the American College of Neuropsychopharmacology* 45 (6): 1068–77.
- 045 Guzowski, John F., Jerilyn A. Timlin, Badri Roysam, Bruce L. McNaughton, Paul F. Worley, and Carol A.  
046 Barnes. 2005. "Mapping Behaviorally Relevant Neural Circuits with Immediate-Early Gene Expression."  
047 *Current Opinion in Neurobiology* 15 (5): 599–606.
- 048 Hasenpusch-Theil, Kerstin, Stephen West, Alexandra Kelman, Zrinko Kozic, Sophie Horrocks, Andrew P.  
049 McMahan, David J. Price, John O. Mason, and Thomas Theil. 2018. "Gli3 Controls the Onset of Cortical  
050 Neurogenesis by Regulating the Radial Glial Cell Cycle through Cdk6 Expression." *Development*  
051 *(Cambridge, England)* 145 (17): dev163147.
- 052 Heinrichs, Markus, and Jens Gaab. 2007. "Neuroendocrine Mechanisms of Stress and Social Interaction:  
053 Implications for Mental Disorders." *Current Opinion in Psychiatry* 20 (2): 158–62.
- 054 Hofer, Sonja B., Thomas D. Mrsic-Flogel, Tobias Bonhoeffer, and Mark Hübener. 2009. "Experience Leaves  
055 a Lasting Structural Trace in Cortical Circuits." *Nature* 457 (7227): 313–17.
- 056 Hoffmann, Ary A., and Loren H. Rieseberg. 2008. "Revisiting the Impact of Inversions in Evolution: From  
057 Population Genetic Markers to Drivers of Adaptive Shifts and Speciation?" *Annual Review of Ecology,*  
058 *Evolution, and Systematics* 39 (1): 21–42.
- 059 Hoke, Kim L., Michael J. Ryan, and Walter Wilczynski. 2005. "Social Cues Shift Functional Connectivity in the  
060 Hypothalamus." *Proceedings of the National Academy of Sciences of the United States of America* 102 (30):  
061 10712–17.
- 062 Howe, Kerstin, Matthew D. Clark, Carlos F. Torroja, James Torrance, Camille Berthelot, Matthieu Muffato,  
063 John E. Collins, et al. 2013. "The Zebrafish Reference Genome Sequence and Its Relationship to the Human  
064 Genome." *Nature* 496 (7446): 498–503.
- 065 Huang, Kaichi, and Loren H. Rieseberg. 2020. "Frequency, Origins, and Evolutionary Role of Chromosomal  
066 Inversions in Plants." *Frontiers in Plant Science* 11 (March): 296.
- 067 Huffman, Lin S., Lauren A. O'Connell, and Hans A. Hofmann. 2013. "Aromatase Regulates Aggression in the  
068 African Cichlid Fish *Astatotilapia Burtoni*." *Physiology & Behavior* 112–113 (March): 77–83.
- 069 Hung, Lin W., Sophie Neuner, Jai S. Polepalli, Kevin T. Beier, Matthew Wright, Jessica J. Walsh, Eastman M.  
070 Lewis, et al. 2017. "Gating of Social Reward by Oxytocin in the Ventral Tegmental Area." *Science (New York,*  
071 *N.Y.)* 357 (6358): 1406–11.
- 072 Ikeda, Kazuhiro, Kuniko Horie-Inoue, and Satoshi Inoue. 2015. "Identification of Estrogen-Responsive Genes  
073 Based on the DNA Binding Properties of Estrogen Receptors Using High-Throughput Sequencing  
074 Technology." *Acta Pharmacologica Sinica* 36 (1): 24–31.

- 075 Ishii, Kentaro K., and Kazushige Touhara. 2019. "Neural Circuits Regulating Sexual Behaviors via the  
076 Olfactory System in Mice." *Neuroscience Research* 140 (March): 59–76.
- 077 Johnson, Zachary V., Manu Tej Sharma Arrojjwala, Vineeth Aljapur, Tyrone Lee, Tucker J. Lancaster, Mark  
078 C. Lowder, Karen Gu, et al. 2020. "Automated Measurement of Long-Term Bower Behaviors in Lake Malawi  
079 Cichlids Using Depth Sensing and Action Recognition." *Scientific Reports* 10 (1): 20573.
- 080 Johnson, Zachary V., Emily C. Moore, Ryan Y. Wong, John R. Godwin, Jeffrey T. Strelman, and Reade B.  
081 Roberts. 2020. "Exploratory Behaviour Is Associated with Microhabitat and Evolutionary Radiation in Lake  
082 Malawi Cichlids." *Animal Behaviour* 160 (February): 121–34.
- 083 Johnson, Zachary V., Hasse Walum, Yaseen A. Jamal, Yao Xiao, Elaine C. Keebaugh, Kiyoshi Inoue, and  
084 Larry J. Young. 2016. "Central Oxytocin Receptors Mediate Mating-Induced Partner Preferences and  
085 Enhance Correlated Activation across Forebrain Nuclei in Male Prairie Voles." *Hormones and Behavior* 79  
086 (March): 8–17.
- 087 Johnson, Zachary V., Hasse Walum, Yao Xiao, Paula C. Riefkohl, and Larry J. Young. 2017. "Oxytocin  
088 Receptors Modulate a Social Salience Neural Network in Male Prairie Voles." *Hormones and Behavior* 87  
089 (January): 16–24.
- 090 Johnson, Zachary V., and Larry J. Young. 2015. "Neurobiological Mechanisms of Social Attachment and Pair  
091 Bonding." *Current Opinion in Behavioral Sciences* 3 (June): 38–44.
- 092 Johnson, Zachary V., and Larry J. Young. 2017. "Oxytocin and Vasopressin Neural Networks: Implications for  
093 Social Behavioral Diversity and Translational Neuroscience." *Neuroscience and Biobehavioral Reviews* 76  
094 (Pt A): 87–98.
- 095 Johnson, Zachary V., and Larry J. Young. 2018. "Evolutionary Diversity as a Catalyst for Biological  
096 Discovery." *Integrative Zoology* 13 (6): 616–33.
- 097 Jourjine, Nicholas, and Hopi E. Hoekstra. 2021. "Expanding Evolutionary Neuroscience: Insights from  
098 Comparing Variation in Behavior." *Neuron* 109 (7): 1084–99.
- 099 Juntti, Scott. 2019. "The Future of Gene-Guided Neuroscience Research in Non-Traditional Model  
100 Organisms." *Brain, Behavior and Evolution* 93 (2–3): 108–21.
- 101 Juntti, Scott A., Austin T. Hilliard, Kai R. Kent, Anusha Kumar, Andrew Nguyen, Mariana A. Jimenez, Jasmine  
102 L. Loveland, Philippe Mourrain, and Russell D. Fernald. 2016. "A Neural Basis for Control of Cichlid Female  
103 Reproductive Behavior by Prostaglandin F<sub>2α</sub>." *Current Biology: CB* 26 (7): 943–49.
- 104 Jurisch-Yaksi, Nathalie, Emre Yaksi, and Caghan Kizil. 2020. "Radial Glia in the Zebrafish Brain: Functional,  
105 Structural, and Physiological Comparison with the Mammalian Glia." *Glia* 68 (12): 2451–70.
- 106 Kastanenka, Ksenia V., Rubén Moreno-Bote, Maurizio De Pittà, Gertrudis Perea, Abel Eraso-Pichot, Roser  
107 Masgrau, Kira E. Poskanzer, and Elena Galea. 2020. "A Roadmap to Integrate Astrocytes into Systems  
108 Neuroscience." *Glia* 68 (1): 5–26.
- 109 Keifer, Joyce, and Cliff H. Summers. 2016. "Putting the 'Biology' Back into 'Neurobiology': The Strength of  
110 Diversity in Animal Model Systems for Neuroscience Research." *Frontiers in Systems Neuroscience* 10  
111 (August): 69.
- 112 Keleman, Krystyna, Eleftheria Vrontou, Sebastian Krüttner, Jai Y. Yu, Amina Kurtovic-Kozaric, and Barry J.  
113 Dickson. 2012. "Dopamine Neurons Modulate Pheromone Responses in Drosophila Courtship Learning."  
114 *Nature* 489 (7414): 145–49.
- 115 Kelly, Martin J., and Oline K. Rønnekleiv. 2009. "Control of CNS Neuronal Excitability by Estrogens via  
116 Membrane-Initiated Signaling." *Molecular and Cellular Endocrinology* 308 (1–2): 17–25.



- 117 Kimchi, Tali, Jennings Xu, and Catherine Dulac. 2007. "A Functional Circuit Underlying Male Sexual  
118 Behaviour in the Female Mouse Brain." *Nature* 448 (7157): 1009–14.
- 119 Kirkpatrick, Mark, and Nick Barton. 2006. "Chromosome Inversions, Local Adaptation and Speciation."  
120 *Genetics* 173 (1): 419–34.
- 121 Klinge, C. M. 2001. "Estrogen Receptor Interaction with Estrogen Response Elements." *Nucleic Acids  
122 Research* 29 (14): 2905–19.
- 123 Kohl, Johannes, Benedicte M. Babayan, Nimrod D. Rubinstein, Anita E. Autry, Brenda Marin-Rodriguez,  
124 Vikrant Kapoor, Kazunari Miyamishi, et al. 2018. "Functional Circuit Architecture Underlying Parental  
125 Behaviour." *Nature* 556 (7701): 326–31.
- 126 Küpper, Clemens, Michael Stocks, Judith E. Risse, Natalie Dos Remedios, Lindsay L. Farrell, Susan B.  
127 McRae, Tawna C. Morgan, et al. 2016. "A Supergene Determines Highly Divergent Male Reproductive  
128 Morphs in the Ruff." *Nature Genetics* 48 (1): 79–83.
- 129 Labusch, Miriam, Laure Mancini, David Morizet, and Laure Bally-Cuif. 2020. "Conserved and Divergent  
130 Features of Adult Neurogenesis in Zebrafish." *Frontiers in Cell and Developmental Biology* 8 (June): 525.
- 131 Lacar, Benjamin, Sara B. Linker, Baptiste N. Jaeger, Suguna Krishnaswami, Jerika Barron, Martijn Kelder,  
132 Sarah Parylak, et al. 2016. "Nuclear RNA-Seq of Single Neurons Reveals Molecular Signatures of  
133 Activation." *Nature Communications* 7 (April): 11022.
- 134 Lai, Cora Sau Wan, Avital Adler, and Wen-Biao Gan. 2018. "Fear Extinction Reverses Dendritic Spine  
135 Formation Induced by Fear Conditioning in the Mouse Auditory Cortex." *Proceedings of the National  
136 Academy of Sciences of the United States of America* 115 (37): 9306–11.
- 137 Lamichhaney, Sangeet, Guangyi Fan, Fredrik Widemo, Ulrika Gunnarsson, Doreen Schwochow Thalmann,  
138 Marc P. Hoepfner, Susanne Kerje, et al. 2016. "Structural Genomic Changes Underlie Alternative  
139 Reproductive Strategies in the Ruff (*Philomachus pugnax*)." *Nature Genetics* 48 (1): 84–88.
- 140 Laurent, Gilles. 2020. "On the Value of Model Diversity in Neuroscience." *Nature Reviews. Neuroscience* 21  
141 (8): 395–96.
- 142 Lévy, Frederic, Martine Batailler, Maryse Meurisse, and Martine Migaud. 2017. "Adult Neurogenesis in  
143 Sheep: Characterization and Contribution to Reproduction and Behavior." *Frontiers in Neuroscience* 11  
144 (October): 570.
- 145 Lipsky, Robert H., and Ann M. Marini. 2007. "Brain-Derived Neurotrophic Factor in Neuronal Survival and  
146 Behavior-Related Plasticity." *Annals of the New York Academy of Sciences* 1122 (1): 130–43.
- 147 Long, Lijiang, Zachary V. Johnson, Junyu Li, Tucker J. Lancaster, Vineeth Aljapur, Jeffrey T. Strelman, and  
148 Patrick T. McGrath. 2020. "Automatic Classification of Cichlid Behaviors Using 3D Convolutional Residual  
149 Networks." *iScience* 23 (10): 101591.
- 150 Louilot, A., J. L. Gonzalez-Mora, T. Guadalupe, and M. Mas. 1991. "Sex-Related Olfactory Stimuli Induce a  
151 Selective Increase in Dopamine Release in the Nucleus Accumbens of Male Rats. A Voltammetric Study."  
152 *Brain Research* 553 (2): 313–17.
- 153 Lukaszewicz, Agnès I., and David J. Anderson. 2011. "Cyclin D1 Promotes Neurogenesis in the Developing  
154 Spinal Cord in a Cell Cycle-Independent Manner." *Proceedings of the National Academy of Sciences of the  
155 United States of America* 108 (28): 11632–37.
- 156 Lyons, Michelle R., and Anne E. West. 2011. "Mechanisms of Specificity in Neuronal Activity-Regulated Gene  
157 Transcription." *Progress in Neurobiology* 94 (3): 259–95.
- 158 Maney, Donna L., Jennifer R. Merritt, Mackenzie R. Prichard, Brent M. Horton, and Soojin V. Yi. 2020. "Inside  
159 the Supergene of the Bird with Four Sexes." *Hormones and Behavior* 126 (104850): 104850.

- 160 Martelotto, Luciano G. 2020. "Frankenstein' Protocol for Nuclei Isolation from Fresh and Frozen Tissue for  
161 SnRNAseq Protocol Guidelines." *Protocols.io*. December 21, 2020.  
162 <https://www.protocols.io/view/frankenstein-protocol-for-nuclei-isolation-from-f-5jyl8nx98l2w/v3/guidelines>.
- 163 Martinelli, David C., Kylie S. Chew, Astrid Rohlmann, Matthew Y. Lum, Susanne Ressler, Samer Hattar, Axel T.  
164 Brunger, Markus Missler, and Thomas C. Südhof. 2016. "Expression of C1ql3 in Discrete Neuronal  
165 Populations Controls Efferent Synapse Numbers and Diverse Behaviors." *Neuron* 91 (5): 1034–51.
- 166 Maruska, Karen P., Russ E. Carpenter, and Russell D. Fernald. 2012. "Characterization of Cell Proliferation  
167 throughout the Brain of the African Cichlid Fish *Astatotilapia Burtoni* and Its Regulation by Social Status." *The*  
168 *Journal of Comparative Neurology* 520 (15): 3471–91.
- 169 Maruska, Karen P., and Russell D. Fernald. 2010. "Behavioral and Physiological Plasticity: Rapid Changes  
170 during Social Ascent in an African Cichlid Fish." *Hormones and Behavior* 58 (2): 230–40.
- 171 Merritt, Jennifer R., Kathleen E. Grogan, Wendy M. Zinzow-Kramer, Dan Sun, Eric A. Ortlund, Soojin V. Yi,  
172 and Donna L. Maney. 2020. "A Supergene-Linked Estrogen Receptor Drives Alternative Phenotypes in a  
173 Polymorphic Songbird." *Proceedings of the National Academy of Sciences of the United States of America*  
174 117 (35): 21673–80.
- 175 Mira, Helena, and Javier Morante. 2020. "Neurogenesis from Embryo to Adult - Lessons from Flies and  
176 Mice." *Frontiers in Cell and Developmental Biology* 8 (June): 533.
- 177 Moffitt, Jeffrey R., Dhananjay Bambah-Mukku, Stephen W. Eichhorn, Eric Vaughn, Karthik Shekhar, Julio D.  
178 Perez, Nimrod D. Rubinstein, et al. 2018. "Molecular, Spatial, and Functional Single-Cell Profiling of the  
179 Hypothalamic Preoptic Region." *Science* 362 (6416). <https://doi.org/10.1126/science.aau5324>.
- 180 Moreira, Frederico, Tim-Rasmus Kiehl, Kelvin So, Norbert F. Ajeawung, Carmelita Honculada, Peter Gould,  
181 Russell O. Pieper, and Deepak Kamnasaran. 2011. "NPAS3 Demonstrates Features of a Tumor Suppressive  
182 Role in Driving the Progression of Astrocytomas." *The American Journal of Pathology* 179 (1): 462–76.
- 183 Nagai, Jun, Xinzhu Yu, Thomas Papouin, Eunji Cheong, Marc R. Freeman, Kelly R. Monk, Michael H.  
184 Hastings, et al. 2021. "Behaviorally Consequential Astrocytic Regulation of Neural Circuits." *Neuron* 109 (4):  
185 576–96.
- 186 Nakazawa, Kazu, Thomas J. McHugh, Matthew A. Wilson, and Susumu Tonegawa. 2004. "NMDA Receptors,  
187 Place Cells and Hippocampal Spatial Memory." *Nature Reviews. Neuroscience* 5 (5): 361–72.
- 188 Nelson, L. R., and S. E. Bulun. 2001. "Estrogen Production and Action." *Journal of the American Academy of*  
189 *Dermatology* 45 (3 Suppl): S116-24.
- 190 Nelson, Sacha B., and Vera Valakh. 2015. "Excitatory/Inhibitory Balance and Circuit Homeostasis in Autism  
191 Spectrum Disorders." *Neuron* 87 (4): 684–98.
- 192 Newman, S. W. 1999. "The Medial Extended Amygdala in Male Reproductive Behavior. A Node in the  
193 Mammalian Social Behavior Network." *Annals of the New York Academy of Sciences* 877 (1 ADVANCING  
194 FRO): 242–57.
- 195 O'Connell, Lauren A., and Hans A. Hofmann. 2011. "The Vertebrate Mesolimbic Reward System and Social  
196 Behavior Network: A Comparative Synthesis." *The Journal of Comparative Neurology* 519 (18): 3599–3639.
- 197 O'Connell, Lauren A., and Hans A. Hofmann. 2012. "Evolution of a Vertebrate Social Decision-Making  
198 Network." *Science (New York, N. Y.)* 336 (6085): 1154–57.
- 199 O'Connell, Lauren A., Bryan J. Matthews, and Hans A. Hofmann. 2012. "Isotocin Regulates Paternal Care in  
200 a Monogamous Cichlid Fish." *Hormones and Behavior* 61 (5): 725–33.
- 201 Ogawa, S., A. E. Chester, S. C. Hewitt, V. R. Walker, J. A. Gustafsson, O. Smithies, K. S. Korach, and D. W.  
202 Pfaff. 2000. "Abolition of Male Sexual Behaviors in Mice Lacking Estrogen Receptors Alpha and Beta (Alpha

- 203 Beta ERKO.” *Proceedings of the National Academy of Sciences of the United States of America* 97 (26):  
204 14737–41.
- 205 Ogawa, Sonoko, Shinji Tsukahara, Elena Choleris, and Nandini Vasudevan. 2020. “Estrogenic Regulation of  
206 Social Behavior and Sexually Dimorphic Brain Formation.” *Neuroscience and Biobehavioral Reviews* 110  
207 (March): 46–59.
- 208 Patil, Chinar, Jonathan B. Sylvester, Kawther Abdilleh, Michael W. Norsworthy, Karen Pottin, Milan Malinsky,  
209 Ryan F. Bloomquist, Zachary V. Johnson, Patrick T. McGrath, and Jeffrey T. Strelman. 2021. “Genome-  
210 Enabled Discovery of Evolutionary Divergence in Brains and Behavior.” *Scientific Reports* 11 (1): 13016.
- 211 Pellegrini, Elisabeth, Nicolas Diotel, Colette Vaillant-Capitaine, Rita Pérez Maria, Marie-Madeleine Gueguen,  
212 Ahmed Nasri, Joel Cano Nicolau, and Olivier Kah. 2016. “Steroid Modulation of Neurogenesis: Focus on  
213 Radial Glial Cells in Zebrafish.” *The Journal of Steroid Biochemistry and Molecular Biology* 160 (June): 27–  
214 36.
- 215 Pfenning, Andreas R., Erina Hara, Osceola Whitney, Miriam V. Rivas, Rui Wang, Petra L. Roulhac, Jason T.  
216 Howard, et al. 2014. “Convergent Transcriptional Specializations in the Brains of Humans and Song-Learning  
217 Birds.” *Science (New York, N.Y.)* 346 (6215): 1256846.
- 218 Purcell, Jessica, Alan Brelsford, Yannick Wurm, Nicolas Perrin, and Michel Chapuisat. 2014. “Convergent  
219 Genetic Architecture Underlies Social Organization in Ants.” *Current Biology: CB* 24 (22): 2728–32.
- 220 Ramallo, Martín R., Agustina Birba, Renato M. Honji, Leonel Morandini, Renata G. Moreira, Gustavo M.  
221 Somoza, and Matías Pandolfi. 2015. “A Multidisciplinary Study on Social Status and the Relationship  
222 between Inter-Individual Variation in Hormone Levels and Agonistic Behavior in a Neotropical Cichlid Fish.”  
223 *Hormones and Behavior* 69 (March): 139–51.
- 224 Ribbink, A. J., B. A. Marsh, A. C. Marsh, A. C. Ribbink, and B. J. Sharp. 1983. “A Preliminary Survey of the  
225 Cichlid Fishes of Rocky Habitats in Lake Malawi.” *South African Journal of Zoology* 18 (3): 149–310.
- 226 Robinson, Gene E., Russell D. Fernald, and David F. Clayton. 2008. “Genes and Social Behavior.” *Science*  
227 (*New York, N.Y.*) 322 (5903): 896–900.
- 228 Roesti, Marius, Benjamin Kueng, Dario Moser, and Daniel Berner. 2015. “The Genomics of Ecological  
229 Vicariance in Threespine Stickleback Fish.” *Nature Communications* 6 (1): 8767.
- 230 Salzburger, Walter. 2018. “Understanding Explosive Diversification through Cichlid Fish Genomics.” *Nature*  
231 *Reviews. Genetics* 19 (11): 705–17.
- 232 Santello, Mirko, Nicolas Toni, and Andrea Volterra. 2019. “Astrocyte Function from Information Processing to  
233 Cognition and Cognitive Impairment.” *Nature Neuroscience* 22 (2): 154–66.
- 234 Sarkar, Saamyendra N., Ren-Qi Huang, Shaun M. Logan, Kun Don Yi, Glenn H. Dillon, and James W.  
235 Simpkins. 2008. “Estrogens Directly Potentiate Neuronal L-Type Ca<sup>2+</sup> Channels.” *Proceedings of the*  
236 *National Academy of Sciences of the United States of America* 105 (39): 15148–53.
- 237 Schaal, Sara M., Benjamin C. Haller, and Katie E. Lotterhos. 2022. “Inversion Invasions: When the Genetic  
238 Basis of Local Adaptation Is Concentrated within Inversions in the Face of Gene Flow.” *Philosophical*  
239 *Transactions of the Royal Society of London. Series B, Biological Sciences* 377 (1856): 20210200.
- 240 Schiller, Crystal Edler, Samantha Meltzer-Brody, and David R. Rubinow. 2015. “The Role of Reproductive  
241 Hormones in Postpartum Depression.” *CNS Spectrums* 20 (1): 48–59.
- 242 Shin, Jaehoon, Daniel A. Berg, Yunhua Zhu, Joseph Y. Shin, Juan Song, Michael A. Bonaguidi, Grigori  
243 Enikolopov, et al. 2015. “Single-Cell RNA-Seq with Waterfall Reveals Molecular Cascades Underlying Adult  
244 Neurogenesis.” *Cell Stem Cell* 17 (3): 360–72.



- 245 Silva, Vinicius H. da, Veronika N. Laine, Mirte Bosse, Lewis G. Spurgin, Martijn F. L. Derks, Kees van Oers,  
246 Bert Dibbits, et al. 2019. "The Genomic Complexity of a Large Inversion in Great Tits." *Genome Biology and*  
247 *Evolution* 11 (7): 1870–81.
- 248 Smith, Caroline C., Lindsey C. Vedder, and Lori L. McMahon. 2009. "Estradiol and the Relationship between  
249 Dendritic Spines, NR2B Containing NMDA Receptors, and the Magnitude of Long-Term Potentiation at  
250 Hippocampal CA3-CA1 Synapses." *Psychoneuroendocrinology* 34 Suppl 1 (December): S130-42.
- 251 Smith, Chris R., Amy L. Toth, Andrew V. Suarez, and Gene E. Robinson. 2008. "Genetic and Genomic  
252 Analyses of the Division of Labour in Insect Societies." *Nature Reviews. Genetics* 9 (10): 735–48.
- 253 Soltész, Ivan, and Attila Losonczy. 2018. "CA1 Pyramidal Cell Diversity Enabling Parallel Information  
254 Processing in the Hippocampus." *Nature Neuroscience* 21 (4): 484–93.
- 255 Srivastava, Deepak P., and Peter Penzes. 2011. "Rapid Estradiol Modulation of Neuronal Connectivity and  
256 Its Implications for Disease." *Frontiers in Endocrinology* 2 (November): 77.
- 257 Stefansson, Hreinn, Agnar Helgason, Gudmar Thorleifsson, Valgerdur Steinthorsdottir, Gisli Masson, John  
258 Barnard, Adam Baker, et al. 2005. "A Common Inversion under Selection in Europeans." *Nature Genetics* 37  
259 (2): 129–37.
- 260 Stein, Murray B., Chia-Yen Chen, Sonia Jain, Kevin P. Jensen, Feng He, Steven G. Heeringa, Ronald C.  
261 Kessler, et al. 2017. "Genetic Risk Variants for Social Anxiety." *American Journal of Medical Genetics. Part B,*  
262 *Neuropsychiatric Genetics: The Official Publication of the International Society of Psychiatric Genetics* 174  
263 (4): 470–82.
- 264 Sylvester, J. B., C. A. Rich, C. Yi, J. N. Peres, C. Houart, and J. T. Strelman. 2013. "Competing Signals  
265 Drive Telencephalon Diversity." *Nature Communications* 4: 1745.
- 266 Tilley, F. C., C. Arrondel, C. Chhuon, M. Boisson, N. Cagnard, M. Parisot, G. Menara, et al. 2021. "Disruption  
267 of Pathways Regulated by Integrator Complex in Galloway-Mowat Syndrome Due to WDR73 Mutations."  
268 *Scientific Reports* 11 (1): 5388.
- 269 Tuttle, Elaina M., Alan O. Bergland, Marisa L. Korody, Michael S. Brewer, Daniel J. Newhouse, Patrick Minx,  
270 Maria Stager, et al. 2016. "Divergence and Functional Degradation of a Sex Chromosome-like Supergene."  
271 *Current Biology: CB* 26 (3): 344–50.
- 272 Villanueva Espino, Luis Alberto, Adriana Berenice Silva Gómez, and Dolores Adriana Bravo Durán. 2020.  
273 "Cognitive Training Increases Dendritic Arborization in the Dorsal Hippocampal CA1 and CA3 Neurons of  
274 Female and Male Long-Evans Rats." *Synapse (New York, N.Y.)* 74 (4): e22140.
- 275 Villoutreix, Romain, Diego Ayala, Mathieu Joron, Zachariah Gompert, Jeffrey L. Feder, and Patrik Nosil.  
276 2021. "Inversion Breakpoints and the Evolution of Supergenes." *Molecular Ecology* 30 (12): 2738–55.
- 277 Walton, Clare, Eben Pariser, and Fernando Nottebohm. 2012. "The Zebra Finch Paradox: Song Is Little  
278 Changed, but Number of Neurons Doubles." *The Journal of Neuroscience: The Official Journal of the Society*  
279 *for Neuroscience* 32 (3): 761–74.
- 280 Wilson, Daniel J. 2019. "The Harmonic Mean P-Value for Combining Dependent Tests." *Proceedings of the*  
281 *National Academy of Sciences of the United States of America* 116 (4): 1195–1200.
- 282 Wu, Melody V., Devanand S. Manoli, Eleanor J. Fraser, Jennifer K. Coats, Jessica Tollkuhn, Shin-Ichiro  
283 Honda, Nobuhiro Harada, and Nirao M. Shah. 2009. "Estrogen Masculinizes Neural Pathways and Sex-  
284 Specific Behaviors." *Cell* 139 (1): 61–72.
- 285 Wu, Ye Emily, Lin Pan, Yanning Zuo, Xinmin Li, and Weizhe Hong. 2017. "Detecting Activated Cell  
286 Populations Using Single-Cell RNA-Seq." *Neuron* 96 (2): 313-329.e6.

- 287 Xie, Yuanyuan, and Richard I. Dorsky. 2017. "Development of the Hypothalamus: Conservation, Modification  
288 and Innovation." *Development* 144 (9): 1588–99.
- 289 Yang, Eun-Jin, and Walter Wilczynski. 2007. "Social Experience Organizes Parallel Networks in Sensory and  
290 Limbic Forebrain." *Developmental Neurobiology* 67 (3): 285–303.
- 291 York, Ryan A., Chinar Patil, Kawther Abdilleh, Zachary V. Johnson, Matthew A. Conte, Martin J. Genner,  
292 Patrick T. McGrath, Hunter B. Fraser, Russell D. Fernald, and J. Todd Streelman. 2018. "Behavior-  
293 Dependent Cis Regulation Reveals Genes and Pathways Associated with Bower Building in Cichlid Fishes."  
294 *Proceedings of the National Academy of Sciences of the United States of America* 115 (47): E11081–90.
- 295 York, Ryan A., Chinar Patil, C. Darrin Hulsey, J. Todd Streelman, and Russell D. Fernald. 2015. "Evolution of  
296 Bower Building in Lake Malawi Cichlid Fish: Phylogeny, Morphology, and Behavior." *Frontiers in Ecology and*  
297 *Evolution* 3 (February). <https://doi.org/10.3389/fevo.2015.00018>.
- 298 Yu, Xinzhu, Anna M. W. Taylor, Jun Nagai, Peyman Golshani, Christopher J. Evans, Giovanni Coppola, and  
299 Baljit S. Khakh. 2018. "Reducing Astrocyte Calcium Signaling in Vivo Alters Striatal Microcircuits and Causes  
300 Repetitive Behavior." *Neuron* 99 (6): 1170-1187.e9.
- 301 Zhang, Gaoqun, Luisa Lübke, Fushun Chen, Tanja Beil, Masanari Takamiya, Nicolas Diotel, Uwe Strähle,  
302 and Sepand Rastegar. 2021. "Neuron-Radial Glial Cell Communication via BMP/Id1 Signaling Is Key to Long-  
303 Term Maintenance of the Regenerative Capacity of the Adult Zebrafish Telencephalon." *Cells (Basel,*  
304 *Switzerland)* 10 (10): 2794.
- 305 Zhao, Y., H. Z. Sheng, R. Amini, A. Grinberg, E. Lee, S. Huang, M. Taira, and H. Westphal. 1999. "Control of  
306 Hippocampal Morphogenesis and Neuronal Differentiation by the LIM Homeobox Gene Lhx5." *Science (New*  
307 *York, N.Y.)* 284 (5417): 1155–58.
